1

2 **The generality of post-antimicrobial treatment persistence of**  
3 **replicatively-attenuated *Borrelia burgdorferi* in a mouse model**

4

5 **Emir Hodzic<sup>1\*</sup>, Denise M. Imai<sup>2</sup>, Edlin Escobar<sup>1</sup>**

6 <sup>1</sup>Real-Time PCR Research and Diagnostic Core Facility, School of Veterinary Medicine,

7 University of California at Davis, One Shields Avenue, California, United States of

8 America

9 <sup>2</sup>Comparative Pathology Laboratory, School of Veterinary Medicine, University of

10 California at Davis, One Shields Avenue, California, United States of America

11

12

13 **Short Title:** *Borrelia burgdorferi* Persistence

14

15

16 **Funding:** This work was supported by Bay Area Lyme Foundation. The funders had no

17 role in study design, data collection and analysis, decision to publish, or preparation of

18 the manuscript.

19 **Competing Interests:** The authors have declared that no competing interests exist.

20

21

22 **\*Corresponding author:** E-mail: [ehodzic@ucdavis.edu](mailto:ehodzic@ucdavis.edu)

23 **ABSTRACT**

24           A basic feature of infection caused by *Borrelia burgdorferi*, the etiological agent  
25 of Lyme borreliosis, is that persistent infection is the rule, not the norm, in its many hosts.  
26 The ability to persist and evade host immune clearance poses a challenge to effective  
27 antimicrobial treatment. A link between therapy failure and the presence of persister cells  
28 has started to emerge. There is growing experimental evidence that viable, but non-  
29 cultivable spirochetes persist following treatment with several different antimicrobial  
30 agents, then resurge after 12 months. The current study utilized the mouse model to  
31 evaluate if persistence and resurgence occur following antimicrobial treatment in a  
32 disease-susceptible (C3H/HeN) and disease-resistant (C57BL/6) mouse strain infected  
33 with *B. burgdorferi* strains N40 and B31, to confirm the generality of these phenomena.  
34 The status of infection was evaluated at 12 and 18-months after treatment. The results  
35 demonstrated that persistent spirochetes remain viable for up to 18 months following  
36 treatment, but divide slowly, thereby being tolerant to the effects of antimicrobial agents,  
37 as well as being non-cultivable. The phenomenon of persistence and resurgence in  
38 disease-susceptible C3H mice is equally evident in disease-resistant B6 mice, and not  
39 unique to any particular *B. burgdorferi* strain. The results also demonstrate that following  
40 antimicrobial treatment, both strains of *B. burgdorferi*, N40 and B31, lose one or more  
41 small plasmids, resulting in attenuation. The biological relevance of attenuated *B.*  
42 *burgdorferi* spirochetes is probably inconsequential. The study demonstrated that non-  
43 cultivable spirochetes can persist in a host following antimicrobial treatment for a long  
44 time but did not demonstrate their clinical relevance in a mouse model of chronic  
45 infection.

## 46 INTRODUCTION

47 *Borrelia burgdorferi*, the etiological agent of Lyme borreliosis has become an  
48 important public health problem and the most prevalent tick-borne disease in the United  
49 States (1, 2). It occurs across much of the northern hemisphere, causing considerable  
50 morbidity and in some cases mortality in humans, domestic animals, and occasionally  
51 wildlife. It is the most frequently diagnosed tick-borne disease in the United States.  
52 According to the Centers for Disease Control and Prevention (CDC), it is estimated there  
53 are more than 300,000 human cases of Lyme borreliosis annually (3), and is expecting to  
54 rise (4).

55 Untreated human Lyme borreliosis results in disease with a wide range of clinical  
56 symptoms and protean manifestation, depending on the stage of infection (5-9). The  
57 treatment with antimicrobial agents of patients with diagnosed Lyme borreliosis mainly  
58 resolves the objective clinical manifestations. Associated subjective symptoms often may  
59 persist for many weeks, even months (10). However, a proportion of patients remain ill  
60 (11, 12) and delayed treatment is associated with negative clinical outcomes (13, 14).  
61 There are many reports that despite resolution of the clinical signs of infection after  
62 treatment with antimicrobial agents, a minority of patients experience chronic Lyme  
63 disease (15-22).

64 A hallmark of Lyme borreliosis is persistent infection. This has been  
65 experimentally proven in *Peromyscus* mice (23), laboratory mice (24), rats (25), hamsters  
66 (26), gerbils (27), guinea pigs (28), dogs (29), and non-human primates (30), and in  
67 reported confirmed spontaneous cases in humans based on culture (31-37) and PCR (38-  
68 41). Chronic cases require prolonged treatment, and treatment is often less effective (15,

69 42-44). Several reports have provided evidence of *B. burgdorferi* presence in collagenous  
70 tissues, following antimicrobial therapy during chronic infection in different animal  
71 models, including mice (45-50), dogs (29, 51, 52), and non-human primates (48, 53, 54),  
72 and in spontaneous cases in humans (17-21). What is unique about all of these studies is  
73 that spirochetes can be detected by PCR for *B. burgdorferi*-specific DNA (BbDNA), but  
74 not by culture. There is also strong scientific evidence that uninfected ticks were able to  
75 acquire *B. burgdorferi* that survive various antimicrobial treatments and transmit them to  
76 naïve hosts following the molt to the next stage (45-47, 50, 54).

77         The nature of the formation of persistent spirochetes is still unknown and is  
78 matter of speculation. Several mechanisms have been proposed that involve a suppression  
79 of the innate and adaptive immune systems, complement inhibition, induction of anti-  
80 inflammatory cytokines, formation of immune complexes, antigenic variation, and  
81 physical seclusion (55-59). *B. burgdorferi* has evolved to persist in immunologically  
82 competent hosts as a survival strategy for maintaining its natural host-vector life cycle  
83 (27, 53, 55, 60). Persistence of non-cultivable spirochetes has been shown to occur  
84 following treatment with several different classes of antimicrobial agents, and the  
85 phenomenon is likely explained by antimicrobial tolerance (in contrast to antimicrobial  
86 resistance or inadequate antimicrobial treatment), in which all classes of antimicrobials  
87 fail to completely eliminate non-dividing or slowly-dividing subpopulations of a broad  
88 array of bacteria and fungi (61, 62). It has been known for decades that during in vitro  
89 passage, *B. burgdorferi* is highly prone to plasmid loss (63-65), and therefore plasmid  
90 loss is likely to also occur during the course of infection and increase over time.

91           In mouse studies performed in this laboratory, mice were treated with ceftriaxone,  
92 doxycycline, or tigecycline at various intervals of infection, and tissues were tested at  
93 intervals after treatment. Tissues remained BbDNA PCR-positive up to 12 months but  
94 were consistently culture-negative. Morphologically intact spirochetes could be  
95 visualized by immunohistochemistry in tissues from treated mice; ticks could acquire  
96 morphologically intact *B. burgdorferi* and BbDNA from treated mice; ticks remained  
97 BbDNA-positive through molting into nymphs and adults; nymphs transmitted BbDNA  
98 to recipient immunocompromised mice; allografts from treated mice transplanted into  
99 recipient immunocompromised mice transferred BbDNA to recipient mice; and both tick-  
100 and transplant-inoculated mice had disseminated BbDNA. BbDNA-positive tissues were  
101 also positive for *B. burgdorferi*-specific RNA transcription. Furthermore, quantitative  
102 PCR indicated low-levels of replication during these various stages (46, 47, 50). In the  
103 most recent study we observed the resurgence of non-cultivable spirochetes in assessed  
104 tissues of antimicrobial treated mice after 12 months, and the overall tissue spirochete  
105 burden reached the levels detected in sham-treated mice at the same time point. Despite  
106 the continued non-cultivable state, RNA transcription of multiple *B. burgdorferi* genes  
107 was detected in host tissues, BbDNA was acquired by xenodiagnostic ticks, and  
108 spirochetal forms could be visualized within ticks and mouse tissues by  
109 immunofluorescence and immunohistochemistry, respectively. A number of host  
110 cytokines were up- or down-regulated in tissues of both saline- and antimicrobial-treated  
111 mice in the absence of histopathology, indicating host response to the presence of non-  
112 cultivable spirochetes, despite the lack of inflammation in tissues (47).

113 We hypothesize that during the course of infection, *B. burgdorferi* proliferates  
114 and incidentally generates an increasingly heterogeneous population of replicatively-  
115 attenuated spirochetes that have lost one or more small plasmids. These “attenuated”  
116 spirochetes remain viable, but because of their plasmid loss, they divide slowly, thereby  
117 being tolerant to the effects of antimicrobials, as well as being non-cultivable.  
118 Results obtained from this study demonstrated the generality of spirochete persistence  
119 and in particular, resurgence, following antimicrobial treatment by demonstrating the  
120 phenomena in genetically susceptible C3H/HeN (C3H) and resistant C57BL/6 (B6)  
121 mouse strains infected with *B. burgdorferi* strain N40 compared to strain B31 for up to 18  
122 months after treatment.

123

## 124 MATERIAL AND METHODS

125 **Mouse infections.** All experiments involving vertebrate animals were approved  
126 by the Institutional Animal Care and Use Committee (IACUC) at University of California  
127 Davis (UCD). All animals were purchased from The Jackson Laboratory, Bar Harbor,  
128 Maine, and were cared for by staff from Teaching and Research Animal Care Services  
129 (TRACS), at UCD. Mice were maintained in an isolated room within filter-top cages and  
130 were provided food and water *ad libitum*. The animals used in this study were C3H and  
131 B6 specific-pathogen-free 5-week-old female mice and were maintained in cohorts of 5  
132 mice per cage under identical husbandry conditions in the same animal room. Euthanasia  
133 was performed by rapid carbon dioxide narcosis in accordance with guidelines of the  
134 American Veterinary Medical Association (AVMA) (66). C3H and B6 mice were  
135 randomly divided into two equal groups. One group of C3H and B6 mice was infected

136 with *B. burgdorferi* N40 and another one with *B. burgdorferi* B31. Each mouse was  
137 infected by syringe inoculation of  $10^4$  *B. burgdorferi* spirochetes at the mid-log phase in  
138 0.1 ml of Barbour-Stoenner-Kelly-II (BSK-II) medium intradermally at the dorsal  
139 thoracic midline.

140 ***B. burgdorferi* culturing.** Two low-passage clonal strains of *B. burgdorferi* sensu  
141 stricto were used. *B. burgdorferi* strains N40 and B31 were cloned by threefold limiting  
142 dilution *in vitro* and passage in mice to prove infectivity and pathogenicity as described  
143 previously (24). Frozen aliquots of clonal strains N40 and B31 were thawed and cultured  
144 in modified BSK-II medium (67) at 33°C. Spirochetes were assessed for viability and  
145 enumerated by dark-field microscopy using a Petroff-Hausser bacterial counting chamber  
146 (Hausser Scientific, Horsham, PA) immediately prior to use, and diluted to appropriate  
147 concentrations in BSKII medium. Mice were inoculated subdermally on the dorsal  
148 thoracic midline with  $10^4$  mid-log phase spirochetes in 0.1 ml of BSK-II medium.  
149 Infection status with cultivable *B. burgdorferi* was determined by culture of urinary  
150 bladder and sub-inoculation site (deep dermis). Tissues were collected from mice  
151 aseptically at necropsy, and then cultured in medium without antibiotic, as described  
152 (68).

153 To determine if resurgent spirochetes regain cultivability at 18 months after  
154 treatment and to increase their detectability, multiple tissue sites were collected and  
155 cultured in four different media. In addition to urinary bladder and inoculation site we  
156 also collected front joint, ear, quadriceps muscle, and spleen. Heart tissue was not  
157 available for culture as was used for PCR and histology. To facilitate cultivation, several  
158 media have been introduced, such as BSK-II medium, modified Kelly-Pettenkofer (MKP)

159 medium, BSK-II + agarose, and BSK-II + carbohydrates medium (cordially provided by  
160 Monica E. Embers of Tulane National Primate Research Center, Covington, Louisiana).  
161 However, these media differ in their potential to support the growth of borreliæ.

162 **Xenodiagnosis.** Laboratory-reared, pathogen-free *Ixodes scapularis* larvae were  
163 provided by Melissa J. Caimano of Department of Molecular Biology and Biophysics,  
164 UConn Health, Farmington, CT. All larvae were derived from single gravid ticks for  
165 each study. Around 40 larval ticks were placed on each mouse 1 week prior to necropsy,  
166 allowed to feed to repletion, collected, and then allowed to molt and harden into nymphs.  
167 Cohorts of ticks collected from each mouse were maintained separately, so that ticks  
168 within each cohort could be tested individually or in groups by qPCR. Nymphal ticks  
169 were frozen in liquid nitrogen, ground with a mortar and pestle, and DNA was extracted  
170 for PCR analysis.

171 **Antimicrobial treatment and monitoring.** The treatment with ceftriaxone was  
172 initiated during the early immune/dissemination stage at 4 weeks post infection of *B.*  
173 *burgdorferi* in immunocompetent C3H and B6 mice to mimic the stages found in human  
174 disease. Previous studies in this laboratory have shown that the minimal inhibitory  
175 concentration (MIC) and minimal bactericidal concentration (MBC) of ceftriaxone is  
176 0.015 µg/ml and 0.06 µg/ml, respectively. The experimental design for this experiment  
177 involved eight treatment groups, as depicted in Table 1. A ceftriaxone dosage of 16  
178 mg/kg in 500 µl 0.9% normal saline was administered intraperitoneally in mice twice  
179 daily for 5 days, followed by once daily for 23 days. Over a 4-h period, serum  
180 concentrations of ceftriaxone in mice were measured on the day of treatment by bleeding  
181 mice at 0, 2 and 4 hours after treatment. Average serum concentrations of ceftriaxone



182 were 18.625 µg/ml, and 1.795 µg/ml at 2 and 4 hours, respectively. As expected,  
183 intraperitoneally administrated ceftriaxone accumulated rapidly in the circulation and  
184 then decreased gradually during the following 2 hours. Studies with ceftriaxone in mice  
185 have been challenged because the pharmacodynamics (T>MIC) of ceftriaxone do not  
186 parallel those in humans. However, the ceftriaxone treatment regimen used in our studies  
187 transiently achieves more than adequate serum concentrations. No differences were  
188 observed in serum ceftriaxone concentrations between different mouse strains (C3H and  
189 B6).

190 **Table 1.** The experimental design for the executed experiment involved eight treatment  
191 groups.

| Group | <i>B. burgdorferi</i> | Mouse strain | Treatment   | 12 months | 18 months | n= |
|-------|-----------------------|--------------|-------------|-----------|-----------|----|
| 1     | N40                   | C3H          | ceftriaxone | 5         | 5         | 10 |
| 2     | B31                   | C3H          | ceftriaxone | 5         | 5         | 10 |
| 3     | N40                   | B6           | ceftriaxone | 5         | 5         | 10 |
| 4     | B31                   | B6           | ceftriaxone | 5         | 5         | 10 |
| 5     | N40                   | C3H          | saline      | 5         | 5         | 10 |
| 6     | B31                   | C3H          | saline      | 5         | 5         | 10 |
| 7     | N40                   | B6           | saline      | 5         | 5         | 10 |
| 8     | B31                   | B6           | saline      | 5         | 5         | 10 |

192

193 **Tissue processing for molecular analysis.** Mouse tissue samples for molecular  
194 analysis were processed as previously described (47, 69), with slight modifications.  
195 Briefly, samples of the heart base, ventricular myocardium (the heart was bisected  
196 through the atria and ventricles, with one-half of the heart base and ventricles used for  
197 nucleic acid extraction and the other half processed for histology), and the left tibiotarsal  
198 joint were collected from each mouse. The samples were collected aseptically,  
199 immediately weighed, snap-frozen in liquid nitrogen, and stored at -80°C before nucleic

200 acid extraction. Total nucleic acid was extracted with QIAcube HT system (Qiagen,  
201 Valencia, Calif.), according to the manufacturer's instructions for tissue or insects. The  
202 system enables semi-automated high-throughput nucleic acid purification, yielding high-  
203 quality pathogen nucleic acids free of contaminants and inhibitors. The copy number of  
204 each *B. burgdorferi* target gene was expressed per milligram of tissue weight.

205 **Molecular quantitative analysis.** Because low DNA/RNA copy numbers were  
206 expected in tissues from antimicrobial-treated mice, each sample was subjected to pre-  
207 amplification. We used the same *B. burgdorferi* outer surface protein (*ospA*) and flagellin  
208 (*flaB*), and a mouse glyceraldehyde-3-phosphate dehydrogenase (*gapDH*) assay primers,  
209 standardized and optimized for real-time quantitative PCR (qPCR), as described (70).  
210 Purified DNA/buffer was heated for 5 minutes at 95°C then placed on ice. Each reaction  
211 contained Advantage buffer, Advantage 2 Polymerase (Takara Bio, Mountain View, CA),  
212 0.2 mM each dNTP, 10 µM of each primer, and DNA template (100 ng/µl). Standard  
213 amplification conditions were as follows: 1 min at 94°C, 25 cycles of 15 s at 94°C, 15 s  
214 at 55°C, and 45 s at 70°C, 5 min at 70°C, and then 10 min at 4°C. The pre-amplified  
215 products were diluted at a ratio of 1:10 and used as templates for qPCR analysis. To  
216 assess transcriptional activity of *B. burgdorferi flaB* and *16S rRNA* genes, first-strand  
217 cDNA was synthesized from total RNA using the QuantiTect Reverse Transcription Kit  
218 (Qiagen) in 50-µL reactions, as described (70). To increase fidelity, efficiency, and  
219 greater yield of cDNA, the Advantage<sup>®</sup> 2 Polymerase Mix (Clontech Laboratories) was  
220 used, according to the manufacturer's instructions.

221 Two specific primers and one internal, fluorescence-labeled probe were designed  
222 with Primer Express<sup>™</sup> software (ThermoFisher Scientific), as described (71). The

223 amplification efficiency (E) of all assays was calculated from the slope of a standard  
224 curve generated on a 10-fold dilution in triplicate for every DNA sample, using the  
225 formula  $E = 10^{(-1/\text{slope})} - 1$ . In order to obtain accurate and reproducible results, all assays  
226 were determined to have an efficiency of >95%. To quantify the copy numbers of DNA  
227 target genes, plasmid standards were prepared in order to create absolute standard curves,  
228 as described (71). Based on the amplification efficiencies, detection limits were  
229 approximately 10 copies of DNA per reaction, and the analytical sensitivity for each  
230 target gene was in the range from <10 to  $10^9$  copies. All samples were assayed in  
231 duplicate with positive and negative controls by the qPCR optimized assays and analyzed  
232 for the presence of mouse *gapDH* in order to determine the efficiency of the nucleic acid  
233 extraction, amplification, and as an indicator of inhibition. Amplification, data  
234 acquisition, and data analysis were performed on a 7900HT Fast Real-Time PCR System  
235 (ThermoFisher, Scientific). The thermal cycling conditions were as follow: 2 min at 50°C  
236 to 10 min at 94.5°C, followed by 40 cycles of denaturation at 97°C for 30 sec, and  
237 annealing and extension at 59.7°C for 1 min.

238 **Histology.** Formalin-fixed rear legs (demineralized in 15% formic acid) and  
239 hearts were routinely processed for histology, paraffin-embedded and sectioned at 5 µm.  
240 Sections were stained with hematoxylin and eosin. All tissues were evaluated by a board-  
241 certified veterinary anatomic pathologist. Legs were examined for evidence of arthritis  
242 and synovitis involving the knee and tibiotarsal joints as characterized by examination of  
243 infiltration of neutrophils, synovial proliferation, and exudation of fibrin into joint or  
244 tendon sheath lumina as well as neutrophil and macrophage infiltration of tissues at the  
245 base of the heart (myocarditis). All determinations were made in a blinded fashion.

246           **Statistics.** Statistical analysis of qPCR data between antimicrobial treated and  
247 sham treated mice at different time points were performed using independent samples *t*-  
248 test or one-way analysis of variance, followed by multiple pairwise comparisons by  
249 Tukey's honestly significant difference (HSD) test (SPSS 16.0 for Mac; SPSS Inc.,  
250 Chicago, IL). Differences were considered significant with  $p \leq 0.5$ .

251           To statistically evaluate the severity of inflammation in collected tissue between  
252 antimicrobial treated and sham treated mice Kruskal-Wallis test was performed using  
253 GraphPad Prism, 7.03.

254

## 255 **RESULTS**

256           **Persistence and resurgence of *B. burgdorferi* N40 and B31 following**  
257 **antimicrobial treatment in C3H and B6 mice.** Mouse tissue samples, heart base,  
258 ventricular muscle, and tibiotarsal joint, were collected aseptically, immediately weighed,  
259 snap-frozen in liquid nitrogen, and stored at  $-80^{\circ}\text{C}$  before total nucleic acid extraction.  
260 Quality control of qPCR was assessed by targeting mouse *gapDH* gene. Spirochetal DNA  
261 was *flaB* and *ospA*. Quantitative data were expressed as the number of DNA copies per  
262 milligram of tissue weight. Mouse *gapDH* qPCR was positive from all assessed samples  
263 (average  $C_q \pm SD$ ,  $19.36 \pm 4.69$ ), confirming successful extraction of total nucleic acid.

264           Based upon *flaB/ospA* DNA qPCR on assessed tissue samples, all C3H and B6  
265 mice inoculated with either *B. burgdorferi* strains N40 or B31 treated with saline were  
266 qPCR-positive at 12 and 18 months after treatment in most tissues. The data in Table 2  
267 and Table 3 summarize positive or negative *flaB/ospA* DNA qPCR results. Among  
268 ceftriaxone-treated C3H and B6 mice infected with N40 or B31, 100% and 74% tested

269 positive for *flaB/ospA* DNA qPCR at tibiotarsal joints at 12 and 18 months after  
 270 treatment, respectively. Sporadically positive heart base and ventricular muscle samples  
 271 were detected in mice at 12 months after antimicrobial treatment (Table 2), but not in  
 272 mice at 18 months (Table 3).  
 273 **Table 2.** Analysis of *flaB/ospA* DNA in heart base, ventricular muscle, and tibiotarsus,  
 274 from *B. burgdorferi* infected mice treated with ceftriaxone and saline solution, then  
 275 necropsied **12 months** after completion of treatment

| Mouse Strain | <i>Borrelia</i> Strain | Treatment   | Heart base | Ventricular muscle | Tibiotarsus |
|--------------|------------------------|-------------|------------|--------------------|-------------|
| C3H          | N40                    | Ceftriaxone | +          | -                  | +           |
| "            | "                      | Ceftriaxone | -          | -                  | +           |
| "            | "                      | Ceftriaxone | +          | -                  | +           |
| "            | "                      | Ceftriaxone | +          | -                  | +           |
| "            | "                      | Ceftriaxone | -          | +                  | +           |
| C3H          | B31                    | Ceftriaxone | -          | -                  | +           |
| "            | "                      | Ceftriaxone | +          | -                  | +           |
| "            | "                      | Ceftriaxone | +          | -                  | +           |
| "            | "                      | Ceftriaxone | -          | -                  | +           |
| "            | "                      | Ceftriaxone | -          | -                  | +           |
| B6           | N40                    | Ceftriaxone | -          | +                  | +           |
| "            | "                      | Ceftriaxone | -          | -                  | +           |
| "            | "                      | Ceftriaxone | -          | -                  | +           |
| "            | "                      | Ceftriaxone | -          | -                  | +           |
| "            | "                      | Ceftriaxone | +          | -                  | +           |
| B6           | B31                    | Ceftriaxone | -          | -                  | +           |
| "            | "                      | Ceftriaxone | -          | -                  | +           |
| "            | "                      | Ceftriaxone | -          | -                  | +           |
| "            | "                      | Ceftriaxone | -          | -                  | +           |
| "            | "                      | Ceftriaxone | +          | -                  | +           |
| C3H          | N40                    | Saline      | +          | +                  | +           |
| "            | "                      | Saline      | +          | +                  | -           |
| "            | "                      | Saline      | -          | +                  | +           |
| "            | "                      | Saline      | +          | +                  | +           |
| "            | "                      | Saline      | +          | +                  | -           |
| C3H          | B31                    | Saline      | +          | +                  | +           |
| "            | "                      | Saline      | +          | +                  | -           |
| "            | "                      | Saline      | +          | +                  | -           |
| "            | "                      | Saline      | +          | +                  | +           |
| "            | "                      | Saline      | +          | +                  | +           |
| B6           | N40                    | Saline      | -          | +                  | -           |
| "            | "                      | Saline      | +          | +                  | +           |
| "            | "                      | Saline      | +          | +                  | -           |
| "            | "                      | Saline      | +          | +                  | +           |
| "            | "                      | Saline      | +          | +                  | -           |
| B6           | B31                    | Saline      | -          | +                  | +           |
| "            | "                      | Saline      | -          | +                  | +           |
| "            | "                      | Saline      | +          | +                  | -           |
| "            | "                      | Saline      | N/A        | N/A                | N/A         |

|   |   |        |     |     |     |
|---|---|--------|-----|-----|-----|
| " | " | Saline | N/A | N/A | N/A |
|---|---|--------|-----|-----|-----|

276

277 **Table 3.** Analysis of *flaB/ospA* DNA in heart base, ventricular muscle, and tibiotarsus,  
 278 from *B. burgdorferi* infected mice treated with ceftriaxone and saline solution, then  
 279 necropsied **18 months** after completion of treatment

| Mouse Strain | <i>Borrelia</i> Strain | Treatment   | Heart base | Ventricular muscle | Tibiotarsus |
|--------------|------------------------|-------------|------------|--------------------|-------------|
| C3H          | N40                    | Ceftriaxone | -          | -                  | -           |
| "            | "                      | Ceftriaxone | -          | -                  | -           |
| "            | "                      | Ceftriaxone | -          | -                  | +           |
| "            | "                      | Ceftriaxone | -          | -                  | -           |
| "            | "                      | Ceftriaxone | N/A        | N/A                | N/A         |
| C3H          | B31                    | Ceftriaxone | -          | -                  | +           |
| "            | "                      | Ceftriaxone | -          | -                  | +           |
| "            | "                      | Ceftriaxone | -          | -                  | +           |
| "            | "                      | Ceftriaxone | -          | -                  | +           |
| "            | "                      | Ceftriaxone | -          | -                  | +           |
| B6           | N40                    | Ceftriaxone | -          | -                  | -           |
| "            | "                      | Ceftriaxone | -          | -                  | +           |
| "            | "                      | Ceftriaxone | -          | -                  | +           |
| "            | "                      | Ceftriaxone | -          | -                  | +           |
| "            | "                      | Ceftriaxone | -          | -                  | +           |
| B6           | B31                    | Ceftriaxone | -          | -                  | +           |
| "            | "                      | Ceftriaxone | -          | -                  | +           |
| "            | "                      | Ceftriaxone | -          | -                  | +           |
| "            | "                      | Ceftriaxone | -          | -                  | +           |
| "            | "                      | Ceftriaxone | -          | -                  | +           |
| C3H          | N40                    | Saline      | +          | +                  | +           |
| "            | "                      | Saline      | +          | +                  | +           |
| "            | "                      | Saline      | -          | +                  | +           |
| "            | "                      | Saline      | +          | +                  | +           |
| "            | "                      | Saline      | N/A        | N/A                | N/A         |
| C3H          | B31                    | Saline      | +          | +                  | +           |
| "            | "                      | Saline      | +          | +                  | +           |
| "            | "                      | Saline      | +          | +                  | +           |
| "            | "                      | Saline      | N/A        | N/A                | N/A         |
| "            | "                      | Saline      | N/A        | N/A                | N/A         |
| B6           | N40                    | Saline      | -          | +                  | +           |
| "            | "                      | Saline      | +          | +                  | +           |
| "            | "                      | Saline      | +          | +                  | +           |
| "            | "                      | Saline      | +          | +                  | +           |
| "            | "                      | Saline      | +          | +                  | +           |
| B6           | B31                    | Saline      | +          | +                  | +           |
| "            | "                      | Saline      | +          | +                  | +           |
| "            | "                      | Saline      | +          | +                  | +           |
| "            | "                      | Saline      | +          | +                  | +           |
| "            | "                      | Saline      | +          | +                  | +           |

280

281 Quantification of each target gene in assessed samples was accomplished by  
282 preparing plasmid standards in order to create absolute standard curves to determine  
283 starting copy number. Mean DNA copy numbers of *flaB/ospA* genes in collected tissue  
284 samples among different mouse strains (C3H and B6) and different *B. burgdorferi* stra  
285 ins (N40 and B31) of ceftriaxone-treated groups at 12 months after treatment were nearly  
286 equivalent (mean  $\pm$  SD,  $2.97 \times 10^1 \pm 1.72 \times 10^1$ ). Among saline-treated groups  
287 significantly higher DNA copy numbers of *flaB/ospA* were determined in C3H mice  
288 infected with N40 and B31 in comparison to B6 mice infected with N40 and B31  
289 ( $P < 0.05$ ) (Fig 1). Significantly higher copy numbers of *flaB/ospA* were determined in  
290 tissue samples of saline-treated mice in comparison to the ceftriaxone-treated mice  
291 ( $P < 0.05$ ) (Fig 1). Thus, these results suggested resurgence of spirochetes at 12 months  
292 following antimicrobial treatment in both C3H and B6 mice infected with both *B.*  
293 *burgdorferi* strains, N40 and B31, although all mice remained culture-negative. qPCR  
294 results also revealed that a population of resurged spirochetes that survived antimicrobial  
295 treatment and detected at 12 months, remained in mice even after 18 months. They were  
296 exclusively detected in tibiotarsal joints of all treatment groups, with mean copy numbers  
297 of *flaB/ospA* per milligram tissue that were nearly equivalent (mean  $\pm$  SD,  $1.52 \times 10^1 \pm$   
298  $9.74 \times 10^0$ ) (Fig 2). qPCR results of saline treated groups at 18 months were similar to the  
299 results of the same treated groups at 12 months. *flaB/ospA* genes copies among saline  
300 treated groups at 18 months were lower in B6 mice infected with N40 and B31 in  
301 comparison to C3H mice infected with N40 and B31, but not significantly. Mean  
302 *flaB/ospA* copy numbers in tibiotarsal joints at 18 months were significantly higher

303 ( $P < 0.05$ ) in saline treated C3H mice infected with N40 and B31 in comparison to the  
304 same groups of antimicrobial treated mice (Fig 2).

305 **Fig 1 and Fig 2**

306 Analysis of *B. burgdorferi flaB* and *16S rRNA* transcriptional activity revealed  
307 that most of the saline treated C3H and B6 mice infected with N40 or B31 strains were  
308 positive. Transcriptional activity of *flaB* in samples from antimicrobial treated mice (C3H  
309 and B6) necropsied at 12 and 18 months after treatment were 52% and 35%, respectively,  
310 while *16S rRNA* was constitutively detected in all samples. The results indicate viability  
311 among the persisting spirochetes.

312 **Confirmation of spirochetes non-cultivability at 12 and 18 months following**  
313 **antimicrobial treatment.** The infection status of mice at 12 months after antimicrobial  
314 treatment was assessed by culture of inoculation site and urinary bladder. For culture, we  
315 used a modified BSK-II medium. The sensitivity of BSK-II medium for detection of  
316 viable spirochetes was verified by serial 10-fold dilutions of a *B. burgdorferi* N40 and  
317 B31 culture, as described (46). The culture results revealed that all saline treated mice  
318 were positive, with significant numbers of spirochetes detected (Table 4). When mice  
319 treated with ceftriaxone evaluated at 12 months after completion of treatment, none of the  
320 tissues were culture positive. In single culture two non-motile spirochetes were observed  
321 (Table 4). Resurgence at 12 months after treatment suggests that spirochetes have  
322 regained some semblance of replicative activity and/or are disseminating once again  
323 within mouse tissues.



324 **Table 4.** Culture results for individual mice treated with ceftriaxone and saline solution  
 325 commencing at 4 weeks after inoculation, then subjected to necropsy at 12 months after  
 326 completion of treatment

| Mouse Strain | <i>Borrelia</i> Strain | Treatment   | Inoculation site | Urinary bladder |
|--------------|------------------------|-------------|------------------|-----------------|
| C3H          | N40                    | Ceftriaxone | -                | -               |
| "            | "                      | Ceftriaxone | -                | -               |
| "            | "                      | Ceftriaxone | -                | -               |
| "            | "                      | Ceftriaxone | -                | -               |
| "            | "                      | Ceftriaxone | -                | -               |
| C3H          | B31                    | Ceftriaxone | N/A              | N/A             |
| "            | "                      | Ceftriaxone | -                | -               |
| "            | "                      | Ceftriaxone | -                | -               |
| "            | "                      | Ceftriaxone | -                | -               |
| "            | "                      | Ceftriaxone | -                | -               |
| B6           | N40                    | Ceftriaxone | -                | -               |
| "            | "                      | Ceftriaxone | -                | -               |
| "            | "                      | Ceftriaxone | -                | -               |
| "            | "                      | Ceftriaxone | -                | -               |
| "            | "                      | Ceftriaxone | -                | +               |
| B6           | B31                    | Ceftriaxone | -                | -               |
| "            | "                      | Ceftriaxone | -                | -               |
| "            | "                      | Ceftriaxone | -                | -               |
| "            | "                      | Ceftriaxone | -                | -               |
| "            | "                      | Ceftriaxone | -                | -               |
| C3H          | N40                    | Saline      | ++               | +++             |
| "            | "                      | Saline      | ++               | +++             |
| "            | "                      | Saline      | ++               | +++             |
| "            | "                      | Saline      | +                | +++             |
| "            | "                      | Saline      | +                | ++              |
| C3H          | B31                    | Saline      | ++               | +++             |
| "            | "                      | Saline      | +                | +               |
| "            | "                      | Saline      | +                | ++              |
| "            | "                      | Saline      | ++               | ++              |
| "            | "                      | Saline      | ++               | ++              |
| B6           | N40                    | Saline      | ++               | +               |
| "            | "                      | Saline      | +                | +               |
| "            | "                      | Saline      | +++              | +               |
| "            | "                      | Saline      | ++               | +               |
| "            | "                      | Saline      | ++               | +++             |
| B6           | B31                    | Saline      | +++              | +++             |
| "            | "                      | Saline      | +                | +               |
| "            | "                      | Saline      | ++               | ++              |
| "            | "                      | Saline      | N/A              | N/A             |
| "            | "                      | Saline      | N/A              | N/A             |

327

328 For the first time point of this study (12 months), a limited number of sample sites  
 329 (urinary bladder and inoculation site) were cultured. These are not optimal sites for  
 330 culture after antimicrobial treatment, since persisting spirochetes tend to be localized to

331 heart base and joint tissue. To determine if resurgent spirochetes regain cultivability at 18  
332 months after treatment, multiple sample types were collected such as joint, ear,  
333 quadriceps muscle, spleen, urinary bladder, and inoculation site. Heart tissue was not  
334 available for culture as was used for PCR and histology. To facilitate cultivation, several  
335 media have been introduced, such as BSK-II medium, modified Kelly-Pettenkofer (MKP)  
336 medium, BSK-II + agarose, and BSK-II + carbohydrates medium. The inoculated  
337 cultures were incubated for 50 days at 33°C and examined weekly. Culture tubes were  
338 gently but thoroughly stirred, and a drop of culture was examined by dark-field  
339 microscopy. The culture results revealed that all saline treated mice were positive, with  
340 significant numbers of motile spirochetes detected (Table 5, Fig 3A) in the majority of  
341 tissue samples cultured. When mice treated with ceftriaxone were evaluated, one ear  
342 tissues sample from B6 mouse infected with B31 (Fig 3B) and one front joint tissue  
343 sample from B6 mouse infected with N40 (Fig 3C) were culture positive (Table 5).  
344 Tissues were cultured in MKP and BSK-II + carb medium, respectively. After 4 weeks of  
345 incubation spirochetes in cultured medium of ceftriaxone treated mice appeared non-  
346 motile with irregular curves (dead), so we were unable to subculture them. These results  
347 confirm our previous findings that antimicrobial-treated spirochetes are not cultivable,  
348 probably as a result of being genetically impaired (plasmid loss) after treatment with  
349 antimicrobials.

350 **Table 5.** Culture results for individual mice treated with ceftriaxone and saline solution  
351 commencing at 4 weeks after inoculation, then subjected to necropsy at 18 months after  
352 completion of treatment

| Mouse Strain | <i>Borrelia</i> Strain | Treatment | IS <sup>a</sup> | Ear | UB <sup>b</sup> | QM <sup>c</sup> | FJ <sup>d</sup> | Sp <sup>e</sup> |
|--------------|------------------------|-----------|-----------------|-----|-----------------|-----------------|-----------------|-----------------|
|--------------|------------------------|-----------|-----------------|-----|-----------------|-----------------|-----------------|-----------------|

|     |     |             |     |     |     |     |     |     |
|-----|-----|-------------|-----|-----|-----|-----|-----|-----|
| C3H | N40 | Ceftriaxone | -   | -   | -   | -   | -   | -   |
| "   | "   | Ceftriaxone | -   | -   | -   | -   | -   | -   |
| "   | "   | Ceftriaxone | -   | -   | -   | -   | -   | -   |
| "   | "   | Ceftriaxone | -   | -   | -   | -   | -   | -   |
| C3H | B31 | Ceftriaxone | -   | -   | -   | -   | -   | -   |
| "   | "   | Ceftriaxone | -   | -   | -   | -   | -   | -   |
| "   | "   | Ceftriaxone | -   | -   | -   | -   | -   | -   |
| "   | "   | Ceftriaxone | -   | -   | -   | -   | -   | -   |
| "   | "   | Ceftriaxone | -   | -   | -   | -   | -   | -   |
| B6  | N40 | Ceftriaxone | -   | -   | -   | -   | -   | -   |
| "   | "   | Ceftriaxone | -   | -   | -   | -   | -   | -   |
| "   | "   | Ceftriaxone | -   | -   | -   | -   | -   | -   |
| "   | "   | Ceftriaxone | -   | -   | -   | -   | -   | -   |
| "   | "   | Ceftriaxone | -   | -   | -   | -   | +   | -   |
| B6  | B31 | Ceftriaxone | -   | -   | -   | -   | -   | -   |
| "   | "   | Ceftriaxone | -   | -   | -   | -   | -   | -   |
| "   | "   | Ceftriaxone | -   | -   | -   | -   | -   | -   |
| "   | "   | Ceftriaxone | -   | -   | -   | -   | -   | -   |
| "   | "   | Ceftriaxone | -   | +   | -   | -   | -   | -   |
| C3H | N40 | Saline      | +   | ++  | +   | +++ | +   | +   |
| "   | "   | Saline      | +   | +++ | +   | +++ | +   | +   |
| "   | "   | Saline      | +   | +   | ++  | +++ | ++  | -   |
| "   | "   | Saline      | +   | +   | +   | +   | +   | +   |
| "   | "   | Saline      | N/A | N/A | N/A | N/A | N/A | N/A |
| C3H | B31 | Saline      | +   | +++ | +   | ++  | +   | +   |
| "   | "   | Saline      | +   | -   | +   | ++  | +   | -   |
| "   | "   | Saline      | +   | -   | -   | -   | +   | -   |
| "   | "   | Saline      | N/A | N/A | N/A | N/A | N/A | N/A |
| "   | "   | Saline      | N/A | N/A | N/A | N/A | N/A | N/A |
| B6  | N40 | Saline      | +   | ++  | +   | ++  | +   | -   |
| "   | "   | Saline      | +   | +   | -   | -   | -   | -   |
| "   | "   | Saline      | ++  | ++  | -   | +   | ++  | +   |
| "   | "   | Saline      | +   | +   | -   | +   | +   | -   |
| "   | "   | Saline      | +   | -   | -   | -   | -   | +   |
| B6  | B31 | Saline      | +++ | +++ | +++ | +++ | +++ | +++ |
| "   | "   | Saline      | +   | +   | +   | +   | +   | +   |
| "   | "   | Saline      | ++  | ++  | ++  | ++  | ++  | ++  |
| "   | "   | Saline      | N/A | N/A | N/A | N/A | N/A | N/A |
| "   | "   | Saline      | N/A | N/A | N/A | N/A | N/A | N/A |

353 <sup>a</sup> Inoculation site; <sup>b</sup> Urinary bladder; <sup>c</sup> Quadriceps muscle; <sup>d</sup> Front joint; <sup>e</sup> Spleen

354

355 **Fig 3**

356 **Persistence of *B. burgdorferi* in xenodiagnostic ticks that fed upon**

357 **antimicrobial-treated mice.** Several days prior to necropsy, each mouse was infested by

358 placing approximately 40 larval *I. scapularis* ticks, derived from a single population of

359 laboratory-reared pathogen-free larvae. Ticks were allowed to feed to repletion. Engorged

360 larvae were collected and allowed to molt into nymphs and harden, thereby allowing

361 post-feeding amplification of spirochete populations and minimization of inhibitory  
 362 products (blood) for PCR. Samples of 5 (saline treated) and 10 (ceftriaxone treated)  
 363 randomly selected nymphal ticks from each tick cohort from each mouse were collected.  
 364 Ticks were tested for the presence of *B. burgdorferi flaB/ospA* DNA by qPCR. Cohorts of  
 365 nymphs from each mouse treated with saline solution at 12 and 18 months were all  
 366 *flaB/ospA* PCR positive (Table 6). Mean copy numbers of *flaB/ospA* DNA ranged from  
 367 389 to 13,100 (mean  $\pm$  SD, 3,120  $\pm$  3,790) and from 97 to 11,950 (mean  $\pm$  SD, 2,340  $\pm$   
 368 2,820) copies per tick at 12 months and 18 months, respectively. In contrast, 9 of 20 and  
 369 3 of 19 ceftriaxone-treated mice had one *flaB/ospA* PCR positive tick each, among the ten  
 370 ticks tested from each mouse at 12 and 18 months, respectively (Table 6).

371 **Table 6.** *flaB/ospA* qPCR results of nymphal that ticks fed on mice treated with  
 372 ceftriaxone and saline solution prior to necropsy at 12 and 18 months after completion of  
 373 treatment

| Mouse Strain | <i>Borrelia</i> Strain | Treatment   | XenoDx 12 months | XenoDx 18 months |
|--------------|------------------------|-------------|------------------|------------------|
| C3H          | N40                    | Ceftriaxone | 1/10             | 0/10             |
| "            | "                      | Ceftriaxone | 0/10             | 0/10             |
| "            | "                      | Ceftriaxone | 1/10             | 1/10             |
| "            | "                      | Ceftriaxone | 1/10             | 0/10             |
| "            | "                      | Ceftriaxone | 0/10             | N/A              |
| C3H          | B31                    | Ceftriaxone | 0/10             | 0/10             |
| "            | "                      | Ceftriaxone | 1/10             | 0/10             |
| "            | "                      | Ceftriaxone | 1/10             | 0/10             |
| "            | "                      | Ceftriaxone | 0/10             | 0/10             |
| "            | "                      | Ceftriaxone | 0/10             | 0/10             |
| B6           | N40                    | Ceftriaxone | 1/10             | 0/10             |
| "            | "                      | Ceftriaxone | 0/10             | 0/10             |
| "            | "                      | Ceftriaxone | 0/10             | 1/10             |
| "            | "                      | Ceftriaxone | 0/10             | 1/10             |
| "            | "                      | Ceftriaxone | 1/10             | 0/10             |
| B6           | B31                    | Ceftriaxone | 0/10             | 0/10             |
| "            | "                      | Ceftriaxone | 0/10             | 0/10             |
| "            | "                      | Ceftriaxone | 0/10             | 0/10             |
| "            | "                      | Ceftriaxone | 1/10             | 0/10             |
| "            | "                      | Ceftriaxone | 1/10             | 0/10             |
| C3H          | N40                    | Saline      | 5/5              | 5/5              |
| "            | "                      | Saline      | 5/5              | 3/5              |

|     |     |        |     |     |
|-----|-----|--------|-----|-----|
| "   | "   | Saline | 3/5 | 3/5 |
| "   | "   | Saline | 5/5 | 5/5 |
| "   | "   | Saline | 4/5 | N/A |
| C3H | B31 | Saline | 5/5 | 3/5 |
| "   | "   | Saline | 4/5 | 5/5 |
| "   | "   | Saline | 5/5 | 3/5 |
| "   | "   | Saline | 5/5 | N/A |
| "   | "   | Saline | 3/5 | N/A |
| B6  | N40 | Saline | 2/5 | 3/5 |
| "   | "   | Saline | 4/5 | 4/5 |
| "   | "   | Saline | 3/5 | 2/5 |
| "   | "   | Saline | 5/5 | 5/5 |
| "   | "   | Saline | 4/5 | 4/5 |
| B6  | B31 | Saline | 3/5 | 5/5 |
| "   | "   | Saline | 2/5 | 2/5 |
| "   | "   | Saline | 4/5 | 4/5 |
| "   | "   | Saline | N/A | 3/5 |
| "   | "   | Saline | N/A | 5/5 |

374

375 **Histopathology of mouse tissues following antimicrobial treatment.** Here we  
376 report on the general features of histopathology, legs were examined for evidence of  
377 arthritis and synovitis, and hearts for neutrophil and macrophage infiltration. At 12  
378 months after treatment inflammatory scores were greatest and more robust for  
379 myocarditis in control C3H/N40 and C3H/B31 mice in comparison to antimicrobial  
380 treatment groups (Fig 4). Tibiotarsal arthritis was mild, characterized predominantly by  
381 synovial hyperplasia and hypertrophy with joint or tendon sheath effusion in both,  
382 antimicrobial treated and control mice at 12 months. There are statistically significant  
383 differences (Kruskal-Wallis test,  $p = 0.0227$ ) between groups based on myocarditis  
384 scores. Group of antimicrobial C3H/B31 mice has statistically significantly lower scores  
385 than control C3H/B31 mice (Dunn's multiple comparisons test,  $p = 0.043$ ). No  
386 statistically significant differences (Kruskal-Wallis test,  $p = 0.1187$ ) were observed  
387 between groups based on tibiotarsal arthritis scores. Statistical analyses performed using  
388 GraphPad Prism, 7.03 (Table 7). At 18 months inflammatory scores were greatest for  
389 myocarditis in control groups C3H/N40, C3H/B31, and B6/N40 (Fig 4). The chronic

390 periarteritis and tenosynovitis were observed in few control C3H/B31 and B6/N40 mice,  
 391 respectively, a pathohistological findings frequently observed in borrelial chronically  
 392 infected mice (Fig 5). Osteoarthritis was very mild and considered a background age-  
 393 related finding. There are statistically significant differences (Kruskal-Wallis test,  $p =$   
 394 0.0019) between groups based on myocarditis scores. Control groups C3H/N40 and  
 395 C3H/B31 have statistically significantly higher scores than antimicrobial treated group  
 396 C3H/B31 (Dunn's multiple comparisons test,  $p = 0.046$ ,  $p = 0.007$ ). No statistically  
 397 significant differences (Kruskal-Wallis test,  $p = 0.1431$ ) were observed between groups  
 398 based on tibiotarsal arthritis scores. Statistical analyses were performed using GraphPad  
 399 Prism, 7.03 (Table 7).

400 **Table 7.** Histopathological results of heart base and tibiotarsal joint of *B. burgdorferi*  
 401 infected mice treated with either ceftriaxone or sham treated with saline solution

| Mouse Strain | <i>Borrelia</i> Strains | Treatment   | Heart base 12 months | Tibiotarsus 12 months | Heart base 18 months | Tibiotarsus 18 months |
|--------------|-------------------------|-------------|----------------------|-----------------------|----------------------|-----------------------|
| C3H          | N40                     | Ceftriaxone | 0                    | 1                     | 1                    | 0                     |
| "            | "                       | Ceftriaxone | 0                    | 0                     | 1                    | 0                     |
| "            | "                       | Ceftriaxone | 1                    | 1                     | 0                    | 1                     |
| "            | "                       | Ceftriaxone | 1                    | 1                     | 0                    | 1                     |
| "            | "                       | Ceftriaxone | 0                    | 1                     | N/A                  | N/A                   |
| C3H          | B31                     | Ceftriaxone | N/A                  | N/A                   | 0                    | 0                     |
| "            | "                       | Ceftriaxone | 0                    | 0                     | 0                    | 0                     |
| "            | "                       | Ceftriaxone | 0                    | 0                     | 0                    | 0                     |
| "            | "                       | Ceftriaxone | 0                    | 0                     | 0                    | 0                     |
| "            | "                       | Ceftriaxone | 0                    | 0                     | 0                    | 0                     |
| B6           | N40                     | Ceftriaxone | 1                    | 0                     | 0                    | 0                     |
| "            | "                       | Ceftriaxone | 1                    | 0                     | 1                    | 1                     |
| "            | "                       | Ceftriaxone | 0                    | 1                     | 1                    | 0                     |
| "            | "                       | Ceftriaxone | 1                    | 0                     | 0                    | 1                     |
| "            | "                       | Ceftriaxone | 0                    | 1                     | 0                    | 0                     |
| B6           | B31                     | Ceftriaxone | 1                    | 0                     | 1                    | 0                     |
| "            | "                       | Ceftriaxone | 1                    | 0                     | 0                    | 0                     |
| "            | "                       | Ceftriaxone | 0                    | 0                     | 1                    | 0                     |
| "            | "                       | Ceftriaxone | 0                    | 0                     | 0                    | 0                     |
| "            | "                       | Ceftriaxone | 1                    | 0                     | 0                    | 0                     |
| C3H          | N40                     | Saline      | 1                    | 0                     | 1                    | 1                     |
| "            | "                       | Saline      | 2                    | 1                     | 1                    | 1                     |
| "            | "                       | Saline      | 1                    | 1                     | 2                    | 1                     |
| "            | "                       | Saline      | 3                    | 1                     | 2                    | 1                     |

|     |     |        |     |     |     |     |
|-----|-----|--------|-----|-----|-----|-----|
| "   | "   | Saline | 1   | 1   | N/A | N/A |
| C3H | B31 | Saline | 1   | 0   | 2   | 0   |
| "   | "   | Saline | 1   | 1   | 2   | 0   |
| "   | "   | Saline | 2   | 1   | 2   | 1   |
| "   | "   | Saline | 3   | 1   | N/A | N/A |
| "   | "   | Saline | 3   | 1   | N/A | N/A |
| B6  | N40 | Saline | 0   | 1   | 1   | 0   |
| "   | "   | Saline | 0   | 1   | 1   | 0   |
| "   | "   | Saline | 1   | 0   | 1   | 1   |
| "   | "   | Saline | 1   | 1   | 2   | 1   |
| "   | "   | Saline | 1   | 1   | 1   | 1   |
| B6  | B31 | Saline | 2   | 1   | 1   | 0   |
| "   | "   | Saline | 1   | 1   | 0   | 0   |
| "   | "   | Saline | 1   | 0   | 1   | 1   |
| "   | "   | Saline | N/A | N/A | 1   | 0   |
| "   | "   | Saline | N/A | N/A | 1   | 0   |

402 Myocarditis scores by graduation (0-3): 0 = not present; 1 = minimal to mild, focal to  
 403 focally extensive, lymphoplasmacytic infiltrates; 2 = moderate, multifocal,  
 404 lymphoplasmacytic infiltrates; 3 = marked, coalescing to diffuse, lymphoplasmacytic  
 405 infiltrates. Arthritis scores by graduation (0-1): 0 = not present; 1 = synovial  
 406 hyperplasia/hypertrophy and effusion with or without minimal lymphoplasmacytic  
 407 infiltrates

408

409 **Fig 4 and Fig 5**

410 **Plasmid content of attenuated spirochetes.** In our previous work we conducted  
 411 experiments utilizing primarily strain N40, so the designed qPCR assays were based on  
 412 its genome sequences. For analysis of plasmid presence in tissue samples from C3H and  
 413 B6 mice infected with *B. burgdorferi* B31 strain, fewer genes were targeted. A  
 414 comparison of plasmid profile, size, and GC content between N40 and B31 strains appear  
 415 to have major structural differences, so only four designed qPCR assays targeting *bptA*,  
 416 *arp*, *ospA*, and *erp23* are homologous.

417 Among 12-month and 18-month samples, all gene targets were detected in tissue  
 418 samples from saline-treated C3H and B6 mice infected with either *B. burgdorferi* N40

419 and B31 strains (Table 8 and 9). *B. burgdorferi* genomes of N40 strain in tissue samples  
 420 with high Bb DNA copy numbers from 12 antimicrobial-treated mice were uniformly  
 421 missing *bptA* (lp25), *erp22* (cp32-9), and *erp23* (cp34-2), and variably missing *arp* (lp28-  
 422 5), *eppA* (cp9), and *ospC* (cp26), whereas *ospA* (lp54) was detected in all examined tissue  
 423 samples (Table 8). All assessed tissue samples of mice infected with strain B31 were  
 424 uniformly missing *bptA* (lp25) and *arp* (lp28-5), and variably missing *erp23* (cp34-7). As  
 425 in tissue samples from mice infected with strain N40, *ospA* (lp54) was detected in all  
 426 examined samples (Table 9). Data suggest loss of small linear and circular plasmids in  
 427 persisting spirochetes at 12 and 18 months after treatment with antimicrobial. No  
 428 difference was observed between different *B. burgdorferi* strains (B31 and N40) or in  
 429 genetically different strains of mice that are disease-susceptible (C3H) and disease-  
 430 resistant (B6). Most notable was the uniform absence of lp25 in both *B. burgdorferi*  
 431 strains, N40 and B31, loss of which significantly attenuates infectivity in mice, with  
 432 markedly reduced, but detectable levels of infection. Results also demonstrated  
 433 amplification of multiple gene targets, thereby verifying the specificity of residual  
 434 BbDNA results (Tables 8 and 9).

435 **Table 8.** Analysis of plasmid presence in heart base (HB), ventricular muscle (VM), and  
 436 tibiotarsus (TT) of mice infected with *B. burgdorferi* N40 strain then treated with either  
 437 ceftriaxone or sham treated with saline solution

| Mouse Strain | Treatment /Time | Sample Type | chrom <i>flaB</i> | lp25 <i>bptA</i> | lp28-5 <i>arp</i> | lp54 <i>ospA</i> | cp9 <i>eppA</i> | cp26 <i>ospC</i> | cp32-9 <i>erp22</i> | cp34-2 <i>erp23</i> |
|--------------|-----------------|-------------|-------------------|------------------|-------------------|------------------|-----------------|------------------|---------------------|---------------------|
| C3H          | Saline/12       | HB          | +                 | +                | +                 | +                | +               | +                | +                   | +                   |
| B6           | "               | TT          | +                 | +                | +                 | +                | +               | +                | +                   | +                   |
| C3H          | Saline/18       | HB          | +                 | +                | +                 | +                | +               | +                | +                   | +                   |
| B6           | "               | VM          | +                 | +                | +                 | +                | +               | +                | +                   | +                   |
| C3H          | Ceftriaxone /12 | HB          | +                 | -                | -                 | +                | -               | -                | -                   | -                   |
| C3H          | "               | TT          | +                 | -                | -                 | +                | -               | +                | -                   | -                   |



|     |                    |    |   |   |   |   |   |   |   |   |
|-----|--------------------|----|---|---|---|---|---|---|---|---|
| C3H | "                  | TT | + | - | - | + | - | - | - | - |
| B6  | "                  | TT | + | - | + | + | - | - | - | - |
| B6  | "                  | HB | + | - | - | + | - | - | - | - |
| B6  | "                  | TT | + | - | - | + | - | - | - | - |
| C3H | Ceftriaxone<br>/18 | TT | + | - | - | + | - | - | - | - |
| C3H | "                  | TT | + | - | - | + | - | - | - | - |
| C3H | "                  | TT | + | - | + | + | + | + | - | - |
| B6  | "                  | TT | + | - | - | + | - | - | - | - |
| B6  | "                  | TT | + | - | - | + | - | - | - | - |
| B6  | "                  | TT | + | - | - | + | - | - | - | - |

438

439 **Table 9.** Analysis of plasmid presence in heart base (HB), ventricular muscle (VM), and  
 440 tibiotarsus (TT) of mice infected with *B. burgdorferi* **B31** strain then treated with  
 441 ceftriaxone and sham treated with saline solution

| Mouse Strain | Treatment/Time | Sample Type | chrom <i>flaB</i> | lp25 <i>bptA</i> | lp28-1 <i>arp</i> | lp54 <i>ospA</i> | cp34-7 <i>erp23</i> |
|--------------|----------------|-------------|-------------------|------------------|-------------------|------------------|---------------------|
| C3H          | Saline/12      | VM          | +                 | +                | +                 | +                | +                   |
| B6           | "              | VM          | +                 | +                | +                 | +                | +                   |
| C3H          | Saline/18      | HB          | +                 | +                | +                 | +                | +                   |
| B6           | "              | HB          | +                 | +                | +                 | +                | +                   |
| C3H          | Ceftriaxone/12 | TT          | +                 | -                | -                 | +                | -                   |
| C3H          | "              | HB          | +                 | -                | -                 | +                | -                   |
| C3H          | "              | TT          | +                 | -                | -                 | +                | -                   |
| B6           | "              | TT          | +                 | -                | -                 | +                | +                   |
| B6           | "              | HB          | +                 | -                | -                 | +                | -                   |
| B6           | "              | TT          | +                 | -                | -                 | +                | -                   |
| C3H          | Ceftriaxone/18 | TT          | +                 | -                | -                 | +                | -                   |
| C3H          | "              | TT          | +                 | -                | -                 | +                | -                   |
| C3H          | "              | TT          | +                 | -                | -                 | +                | -                   |
| B6           | "              | TT          | +                 | -                | -                 | +                | -                   |
| B6           | "              | TT          | +                 | -                | -                 | +                | -                   |
| B6           | "              | TT          | +                 | -                | -                 | +                | -                   |

442

## 443 DISCUSSION

444 The most commonly prescribed antimicrobial agents for the treatment of human  
 445 Lyme borreliosis, such as penicillin, amoxicillin, cefotaxime, cefuroxime, ceftriaxone,

446 doxycycline, and erythromycin, have shown to be effective against *B. burgdorferi* (72,  
447 73). It is important to mention that treatment during early infection is more effective in  
448 clearing the pathogen than treatment during later infection in humans (74) and in the  
449 mouse model (46). Over the past several years, there have been numerous well-supported  
450 reports of *Borrelia* detection after completed antimicrobial therapy (46, 50, 53, 60, 75,  
451 76). All of these studies have in common that spirochetes were detected by PCR for  
452 BbDNA, but not by culture. Morphologically intact spirochetes were visualized by  
453 immunohistochemistry in tissues from antimicrobial-treated mice; ticks could acquire  
454 those spirochetes and transmit them to recipient mice. Mice tissues were positive for *B.*  
455 *burgdorferi*-specific RNA transcripts.

456         In the current study, we evaluated persistence at 12 and 18 months after  
457 ceftriaxone treatment in two strains of mice that are disease-susceptible (C3H) and  
458 disease-resistant (B6). We recognize that inbred mice do not represent genetically  
459 heterogeneous humans but use of two genetically and phenotypically disparate mouse  
460 strains will confirm the generality of persistence, and more importantly resurgence,  
461 following antimicrobial treatment. Disease severity and tissue spirochete burdens vary  
462 among mouse strains (77), although the ID50 among mice is identical (78). C3H/HeJ  
463 mice are susceptible to infection by Gram-negative bacteria as a result of spontaneous  
464 mutation in *Tlr4* gene (79), which may influence the persistence. B6 mice harbor  
465 equivalent tissue spirochete burdens as C3H mice, become persistently infected, and have  
466 normal macrophage function (79).

467         Our results have shown that, indeed, persistence and resurgence in fully  
468 immunocompetent B6 mice is similar to those in disease-susceptible C3H mice, which

469 confirm the generality of persistence in a mouse model. These results confirm our  
470 previous finding (47) that a subpopulation of viable, antimicrobial-tolerant, but slowly  
471 dividing, and persistent spirochetes of *B. burgdorferi* resurged in mice 12 months after  
472 treatment and re-disseminated into multiple tissues. Importantly, copy numbers of  
473 spirochetal DNA in tissue samples of antimicrobial treated disease-resistant B6 mice was  
474 nearly equivalent to those of disease-susceptible C3H mice. However, significantly  
475 higher DNA copy numbers of spirochetal DNA were determined in saline-treated groups  
476 of C3H mice infected with either N40 or B31 in comparison to antimicrobial-treated mice  
477 (C3H and B6). This finding is in concordance with the results published by Armstrong et  
478 al. (80) that C3H mice develop more severe disease than B6 mice, with greater  
479 spirochetes number and later clearance.

480         Despite the fact that tissues of treated mice remained BbDNA PCR-positive at 12  
481 months with significant copy numbers of targeted genes, culture was consistently  
482 negative. Actually, in a single cultured urinary bladder we observed two non-motile  
483 spirochetes for up to three weeks of incubation. On the other hand, all saline-treated mice  
484 were culture-positive. Our studies (46, 47, 50) and those of others (45, 49, 81) in mice,  
485 dogs (29, 52) and non-human primates (53, 54) have all reached similar conclusions:  
486 spirochetes are persisting, but are paradoxically non-cultivable. It was suggested that the  
487 persisting remnants of *B. burgdorferi* in the tissues of infected mice after antimicrobial  
488 treatment is DNA or DNA-containing structures rather than live bacteria (76, 82, 83). In  
489 their *in vitro* study Iyer et al. (84) could not successfully subculture spirochetes after  
490 exposure to ceftriaxone. However, BbDNA was detected by PCR for up to 56 days in  
491 aliquots from both ceftriaxone-treated and untreated cultures. Pavia and Wormser (85)

492 demonstrated that *B. burgdorferi* cannot be cultured from experimentally infected mice  
493 after ceftriaxone treatment with only 5 daily doses. The treatment regimen used in the  
494 study was judged based on the absence of a positive culture.

495 IDSA Guidelines state that “unless proven otherwise, culture should be regarded  
496 as the gold-standard to address viability of *B. burgdorferi*”(86). Culture may indeed be a  
497 gold standard when it is positive, but it is often not. It is apparent that not all isolates or  
498 strains can be easily cultured, and this is especially apparent during long-term infection.  
499 It is becoming increasingly clear that in *B. burgdorferi* infected and antimicrobial treated  
500 animals, spirochetes were non-cultivable but viable, as have been demonstrated by  
501 xenodiagnoses (46, 47, 50, 54), immunohistology (46, 47, 75), and transcriptional activity  
502 of mRNA (47, 50, 54). Here we demonstrated that morphologically intact *B. burgdorferi*  
503 that survived antimicrobial treatment in disease-susceptible C3H mice as well in disease-  
504 resistant B6 mice could be acquired by larval ticks. Ticks remained BbDNA-positive  
505 through molting into nymphs. In addition, transcription of the chromosomally-encoded *B.*  
506 *burgdorferi* *16S rRNA* and *flaB* genes were detected in treated mice, indicating that  
507 spirochetes are metabolically active and alive at 12 months after treatment. The data  
508 obtained in this study indicate that in a significant number of culture-negative tissue  
509 samples following antimicrobial treatment, complementary methods in diagnostic  
510 microbiology should be considered. The clinical significance and the prognostic value of  
511 these findings have to be more deeply investigated. It was shown that dead bacterial  
512 DNA can be detected for up to 4 to 5 months after antimicrobial treatment (87), as  
513 extracellular DNA is very prone to degradation (88, 89). Bacterial mRNAs, on the other  
514 hand, have very short half-lives as degraded by exonucleases very fast. The half-life

515 ranges from a few minutes to several hours, depending on the bacterial strain (90-92).

516 These finding support the fact that non-cultivability of antimicrobial-tolerant and

517 persistent spirochetes does not negate their viability.

518 Our previous studies in mice (46, 47, 50) and those of others (49, 81) are all based

519 on *B. burgdorferi* N40 strain. Although N40 probably represents *B. burgdorferi*, the

520 generality of long-term spirochete persistence following antimicrobial treatment should

521 be evaluated with other *B. burgdorferi* strains. Therefore, we used *B. burgdorferi* strain

522 B31 and confirmed persistence and resurgence at 12 months after antimicrobial treatment

523 in both, C3H and B6, mice. Our results indicate that disseminated spirochetes of two

524 different *B. burgdorferi* strains can persist in mice at 12 and 18 months following

525 antimicrobial treatment. Non-cultivable spirochetes persist in mice (93), dogs (29), and

526 non-human primates (54) inoculated with alternate strains of *B. burgdorferi*, so we are

527 confirming that persistence and resurgence are not unique to N40.

528 An additional long-term interval, holding mice up to 18 months, facilitated

529 several observations regarding persistent antimicrobial-tolerant spirochetes. Within the

530 observation period, there was molecular evidence of BbDNA in 79% of all assessed mice

531 following antimicrobial treatment. Spirochetal DNA was exclusively detected in

532 tibiotarsal joint, but not in heart base and ventricular muscle. Copy numbers of BbDNA

533 are not significantly different between treated C3H and B6 mice infected with either N40

534 or B31. Interestingly, BbDNA copy numbers in tibiotarsal joints of all antimicrobial

535 treated mice at 18 months are equivalent to those at 12 months, suggesting that

536 antimicrobial-tolerant spirochetes remained persistent exclusively in connective-tissue.

537 One of the proposed mechanisms of *B. burgdorferi* immune evasion and persistence is

538 sequestration in connective-tissue, that make them less accessible to cells and molecules  
539 of the host's immune system (55). It was suggested that the joint or a tissue adjacent to  
540 the joint is the niche of persisting *B. burgdorferi* in antimicrobial-treated mice (49). There  
541 is scientific evidence that tissues with greater decorin expression levels such as joint  
542 harbored most spirochete loads during chronic infection (94). The findings of our study  
543 reinforce the notion of persistence of viable spirochetes following antimicrobial treatment  
544 and further implicate the connective-tissue as a privileged site that may partake to its  
545 failure. Although spirochetes resurged 12 months after antimicrobial treatment, overt  
546 disease was not present. Also, despite spirochetes presence, postmortem gross signs of  
547 disease were not observed in assessed tissues (heart, joint) of treated mice at 18 months.  
548 Studies in animal models have shown that resolution of arthritis and carditis is mediated  
549 by the acquired humoral immune response of the host. Under these conditions,  
550 anatomically defined inflammation resolves, but infection persists (95-97). Indeed, even  
551 during the pre-immune phase of infection, spirochetes populate many tissues with no  
552 evidence of inflammation (thus inflammation does not necessarily correlate with  
553 spirochete presence).

554 Spirochetal RNA was detected in the joint tissue of C3H and B6 mice infected  
555 with either N40 or B6 following treatment at 18 months, suggesting their viability.  
556 Interestingly, xenodiagnosis was positive in only three of nineteen treated animals. We  
557 are speculating that the inability to retrieve spirochetes from all treated mice could be  
558 ascribed to a clearance of spirochetes from the heart tissue. Migration of spirochetes from  
559 joints to tick attachment sites, that is usually a head and/or a dorsal part of a mouse body,  
560 is more distant than from a heart. It was also suggested that the efficiency of spirochetal

561 acquisition from a host to a tick depend on the intensity and duration of infection, and it  
562 is significantly less during chronic infection (98). However, we recovered a few slow-  
563 growing spirochetes by culture from joint tissues of two mice, utilizing several specially  
564 prepared media that were cordially provided by Monica E. Embers. We were unable to  
565 propagate the recovered spirochetes as they lysed after 4 weeks. Obviously, the used  
566 media were unable to support the prolonged growth of slow growing and impaired  
567 spirochetes.

568         Here we have shown that following antimicrobial treatment, both strains of *B.*  
569 *burgdorferi*, N40 and B31, generates an increasingly heterogeneous population of  
570 replicatively-attenuated spirochetes that have lost one or more small plasmids. These  
571 “attenuated” spirochetes remain viable, but because of their plasmid loss, they divide  
572 slowly, thereby being tolerant to the effects of antimicrobials, as well as being non-  
573 cultivable. The phenomenon of persistent, non-cultivable *B. burgdorferi* spirochetes after  
574 antimicrobial treatment has been explained by antimicrobial tolerance. Unlike  
575 antimicrobial-resistance, antimicrobial-tolerance to all classes of antimicrobials fail to  
576 completely eliminate non-dividing or slowly-dividing subpopulations of a broad array of  
577 bacteria and fungi (62, 99). It has been shown that *in vitro* passage of *B. burgdorferi* is  
578 predisposed to plasmid loss (63-65). This phenomenon probably occurs throughout the  
579 infection and elevates over time.

580         Clinical relevance of microbial persistence has been demonstrated for  
581 *Burkholderia pseudomallei* (100), *Escherichia coli* (101), *Pseudomonas aeruginosa*  
582 (102), *Candida albicans* (103), *Streptococcus pneumonia* (104), *Staphylococcus aureus*  
583 (101, 105), *Mycobacterium tuberculosis* (106, 107), *Legionella* spp. (108, 109), and

584 *Salmonella enterica* (110). The persistent cells have transient tolerance to antimicrobial  
585 agents and their ability to revert back to a sensitive state, in which cells rapidly divide  
586 make them important in chronic infections. There are two major consequences of the  
587 presence of persister cells: 1) the continuous presence of viable cells during consecutive  
588 rounds of antimicrobial treatment, which contribute to the emergence of antimicrobial  
589 resistance and 2) experimental evidence indicates that prolonged exposure to  
590 antimicrobial agents leads to the selection of high persistent mutants (111, 112). The  
591 biological relevance of attenuated *B. burgdorferi* spirochetes is probably inconsequential,  
592 while their clinical relevance was subject of this study. Our study demonstrated that non-  
593 cultivable spirochetes can persist in a host following antimicrobial treatment for a long  
594 time, but did not demonstrate their clinical relevance in a mouse model of chronic  
595 infection. The clinical relevance of attenuated spirochetes following antimicrobial  
596 treatment and their eventual fate in other animal models require further studies.

597

## 598 REFERENCES

- 599 1. Mead PS. Epidemiology of Lyme disease. *Infect Dis Clin North Am.*  
600 2015;29(2):187-210.
- 601 2. Adrion ER, Aucott J, Lemke KW, Weiner JP. Health care costs, utilization and  
602 patterns of care following Lyme disease. *PLoS One.* 2015;10(2):e0116767.
- 603 3. Nelson CA, Saha S, Kugeler KJ, Delorey MJ, Shankar MB, Hinckley AF, et al.  
604 Incidence of Clinician-Diagnosed Lyme Disease, United States, 2005-2010. *Emerg Infect*  
605 *Dis.* 2015;21(9):1625-31.
- 606 4. Eisen RJ, Eisen L, Beard CB. County-Scale Distribution of *Ixodes scapularis* and  
607 *Ixodes pacificus* (Acari: Ixodidae) in the Continental United States. *J Med Entomol.*  
608 2016;53(2):349-86.
- 609 5. Steere AC, Sikand VK. The presenting manifestations of Lyme disease and the  
610 outcomes of treatment. *N Engl J Med.* 2003;348(24):2472-4.
- 611 6. Tibbles CD, Edlow JA. Does this patient have erythema migrans? *JAMA.*  
612 2007;297(23):2617-27.



- 613 7. Stinco G, Ruscio M, Bergamo S, Trotter D, Patrone P. Clinical Features of 705  
614 *Borrelia burgdorferi* Seropositive Patients in an Endemic Area of  
615 Northern Italy. *The Scientific World Journal*. 2014;2014:6.
- 616 8. Strle F, Wormser GP, Mead P, Dhadvai K, Longo MV, Adenikinju O, et al.  
617 Gender Disparity between Cutaneous and Non-Cutaneous Manifestations of Lyme  
618 *Borreliosis*. *PLoS ONE*. 2013;8(5):e64110.
- 619 9. Steere AC, Dhar A, Hernandez J, Fischer PA, Sikand VK, Schoen RT, et al.  
620 Systemic symptoms without erythema migrans as the presenting picture of early Lyme  
621 disease. *Am J Med*. 2003;114(1):58-62.
- 622 10. Baker PJ, Wormser GP. The Clinical Relevance of Studies on *Borrelia*  
623 *burgdorferi* Persists. *Am J Med*. 2017.
- 624 11. Aucott JN. Posttreatment Lyme Disease Syndrome. *Infectious Disease Clinics of*  
625 *North America*. 2015;29(2):309-23.
- 626 12. Aucott JN, Crowder LA, Kortte KB. Development of a foundation for a case  
627 definition of post-treatment Lyme disease syndrome. *International Journal of Infectious*  
628 *Diseases*. 2013;17(6):e443-e9.
- 629 13. Asch ES, Bujak DI, Weiss M, Peterson MG, Weinstein A. Lyme disease: an  
630 infectious and postinfectious syndrome. *J Rheumatol*. 1994;21(3):454-61.
- 631 14. Shadick NA, Phillips CB, Logigian EL, Steere AC, Kaplan RF, Berardi VP, et al.  
632 The long-term clinical outcomes of Lyme disease. A population-based retrospective  
633 cohort study. *Annals of Internal Medicine*. 1994;121(8):560-7.
- 634 15. Feder HM, Jr., Johnson BJ, O'Connell S, Shapiro ED, Steere AC, Wormser GP, et  
635 al. A critical appraisal of "chronic Lyme disease". *N Engl J Med*. 2007;357(14):1422-30.
- 636 16. Marques A, Telford SR, 3rd, Turk SP, Chung E, Williams C, Dardick K, et al.  
637 Xenodiagnosis to detect *Borrelia burgdorferi* infection: a first-in-human study. *Clin Infect*  
638 *Dis*. 2014;58(7):937-45.
- 639 17. Breier F, Khanakah G, Stanek G, Kunz G, Aberer E, Schmidt B, et al. Isolation  
640 and polymerase chain reaction typing of *Borrelia afzelii* from a skin lesion in a  
641 seronegative patient with generalized ulcerating bullous lichen sclerosus et atrophicus. *Br*  
642 *J Dermatol*. 2001;144(2):387-92.
- 643 18. Honegr K, Hulinska D, Beran J, Dostal V, Havlasova J, Cermakova Z. Long term  
644 and repeated electron microscopy and PCR detection of *Borrelia burgdorferi* sensu lato  
645 after an antibiotic treatment. *Cent Eur J Public Health*. 2004;12(1):6-11.
- 646 19. Hunfeld KP, Ruzic-Sabljić E, Norris DE, Kraiczky P, Strle F. In vitro susceptibility  
647 testing of *Borrelia burgdorferi* sensu lato isolates cultured from patients with erythema  
648 migrans before and after antimicrobial chemotherapy. *Antimicrob Agents Chemother*.  
649 2005;49(4):1294-301.
- 650 20. Oksi J, Marjamaki M, Nikoskelainen J, Viljanen MK. *Borrelia burgdorferi*  
651 detected by culture and PCR in clinical relapse of disseminated Lyme borreliosis. *Ann*  
652 *Med*. 1999;31(3):225-32.
- 653 21. Priem S, Burmester GR, Kamradt T, Wolbart K, Rittig MG, Krause A. Detection  
654 of *Borrelia burgdorferi* by polymerase chain reaction in synovial membrane, but not in  
655 synovial fluid from patients with persisting Lyme arthritis after antibiotic therapy. *Ann*  
656 *Rheum Dis*. 1998;57(2):118-21.

- 657 22. Middelveen MJ, Sapi E, Burke J, Filush KR, Franco A, Fesler MC, et al.  
658 Persistent *Borrelia* Infection in Patients with Ongoing Symptoms of Lyme Disease.  
659 Healthcare (Basel). 2018;6(2).
- 660 23. Schwan TG, Burgdorfer W, Schrupf ME, Karstens RH. The urinary bladder, a  
661 consistent source of *Borrelia burgdorferi* in experimentally infected white-footed mice  
662 (*Peromyscus leucopus*). J Clin Microbiol. 1988;26(5):893-5.
- 663 24. Barthold SW, de Souza MS, Janotka JL, Smith AL, Persing DH. Chronic Lyme  
664 borreliosis in the laboratory mouse. Am J Pathol. 1993;143(3):959-71.
- 665 25. Moody KD, Barthold SW, Terwilliger GA, Beck DS, Hansen GM, Jacoby RO.  
666 Experimental chronic Lyme borreliosis in Lewis rats. Am J Trop Med Hyg.  
667 1990;42(2):165-74.
- 668 26. Goodman JL, Jurkovich P, Kodner C, Johnson RC. Persistent cardiac and urinary  
669 tract infections with *Borrelia burgdorferi* in experimentally infected Syrian hamsters. J  
670 Clin Microbiol. 1991;29(5):894-6.
- 671 27. Preac Mursic V, Patsouris E, Wilske B, Reinhardt S, Gross B, Mehraein P.  
672 Persistence of *Borrelia burgdorferi* and histopathological alterations in experimentally  
673 infected animals. A comparison with histopathological findings in human Lyme disease.  
674 Infection. 1990;18(6):332-41.
- 675 28. Sonnesyn SW, Manivel JC, Johnson RC, Goodman JL. A guinea pig model for  
676 Lyme disease. Infect Immun. 1993;61(11):4777-84.
- 677 29. Straubinger RK, Summers BA, Chang YF, Appel MJ. Persistence of *Borrelia*  
678 *burgdorferi* in experimentally infected dogs after antibiotic treatment. J Clin Microbiol.  
679 1997;35(1):111-6.
- 680 30. Roberts ED, Bohm RP, Jr., Cogswell FB, Lanners HN, Lowrie RC, Jr., Povinelli  
681 L, et al. Chronic lyme disease in the rhesus monkey. Lab Invest. 1995;72(2):146-60.
- 682 31. Asbrink E, Hovmark A. Successful cultivation of spirochetes from skin lesions of  
683 patients with erythema chronicum migrans Afzelius and acrodermatitis chronica  
684 atrophicans. Acta Pathol Microbiol Immunol Scand B. 1985;93(2):161-3.
- 685 32. Kuiper H, van Dam AP, Spanjaard L, de Jongh BM, Widjojokusumo A,  
686 Ramselaar TC, et al. Isolation of *Borrelia burgdorferi* from biopsy specimens taken from  
687 healthy-looking skin of patients with Lyme borreliosis. J Clin Microbiol. 1994;32(3):715-  
688 20.
- 689 33. Maraspin V, Ogrinc K, Ruzic-Sabljić E, Lotric-Furlan S, Strle F. Isolation of  
690 *Borrelia burgdorferi sensu lato* from blood of adult patients with borrelial lymphocytoma,  
691 Lyme neuroborreliosis, Lyme arthritis and acrodermatitis chronica atrophicans. Infection.  
692 2011;39(1):35-40.
- 693 34. Miklossy J, Khalili K, Gern L, Ericson RL, Darekar P, Bolle L, et al. *Borrelia*  
694 *burgdorferi* persists in the brain in chronic lyme neuroborreliosis and may be associated  
695 with Alzheimer disease. J Alzheimers Dis. 2004;6(6):639-49; discussion 73-81.
- 696 35. Snyderman DR, Schenkein DP, Berardi VP, Lastavica CC, Pariser KM. *Borrelia*  
697 *burgdorferi* in joint fluid in chronic Lyme arthritis. Ann Intern Med. 1986;104(6):798-  
698 800.
- 699 36. Stanek G, Klein J, Bittner R, Glogar D. Isolation of *Borrelia burgdorferi* from the  
700 myocardium of a patient with longstanding cardiomyopathy. N Engl J Med.  
701 1990;322(4):249-52.

- 702 37. Strle F, Cheng Y, Cimperman J, Maraspin V, Lotric-Furlan S, Nelson JA, et al.  
703 Persistence of *Borrelia burgdorferi* sensu lato in resolved erythema migrans lesions. *Clin*  
704 *Infect Dis*. 1995;21(2):380-9.
- 705 38. Bradley JF, Johnson RC, Goodman JL. The persistence of spirochetal nucleic  
706 acids in active Lyme arthritis. *Ann Intern Med*. 1994;120(6):487-9.
- 707 39. Moter SE, Hofmann H, Wallich R, Simon MM, Kramer MD. Detection of  
708 *Borrelia burgdorferi* sensu lato in lesional skin of patients with erythema migrans and  
709 acrodermatitis chronica atrophicans by ospA-specific PCR. *J Clin Microbiol*.  
710 1994;32(12):2980-8.
- 711 40. Nocton JJ, Dressler F, Rutledge BJ, Rys PN, Persing DH, Steere AC. Detection of  
712 *Borrelia burgdorferi* DNA by polymerase chain reaction in synovial fluid from patients  
713 with Lyme arthritis. *N Engl J Med*. 1994;330(4):229-34.
- 714 41. von Stedingk LV, Olsson I, Hanson HS, Asbrink E, Hovmark A. Polymerase  
715 chain reaction for detection of *Borrelia burgdorferi* DNA in skin lesions of early and late  
716 Lyme borreliosis. *Eur J Clin Microbiol Infect Dis*. 1995;14(1):1-5.
- 717 42. Bockenstedt LK, Radolf JD. Xenodiagnosis for posttreatment Lyme disease  
718 syndrome: resolving the conundrum or adding to it? *Clin Infect Dis*. 2014;58(7):946-8.
- 719 43. Marques A. Chronic Lyme disease: a review. *Infect Dis Clin North Am*.  
720 2008;22(2):341-60, vii-viii.
- 721 44. Gaubitz M, Dressler F, Huppertz HI, Krause A, Kommission Pharmakotherapie  
722 der D. [Diagnosis and treatment of Lyme arthritis. Recommendations of the  
723 Pharmacotherapy Commission of the Deutsche Gesellschaft für Rheumatologie (German  
724 Society for Rheumatology)]. *Z Rheumatol*. 2014;73(5):469-74.
- 725 45. Bockenstedt LK, Mao J, Hodzic E, Barthold SW, Fish D. Detection of attenuated,  
726 noninfectious spirochetes in *Borrelia burgdorferi*-infected mice after antibiotic treatment.  
727 *J Infect Dis*. 2002;186(10):1430-7.
- 728 46. Hodzic E, Feng S, Holden K, Freet KJ, Barthold SW. Persistence of *Borrelia*  
729 *burgdorferi* following antibiotic treatment in mice. *Antimicrob Agents Chemother*.  
730 2008;52(5):1728-36.
- 731 47. Hodzic E, Imai D, Feng S, Barthold SW. Resurgence of persisting non-cultivable  
732 *Borrelia burgdorferi* following antibiotic treatment in mice. *PLoS One*.  
733 2014;9(1):e86907.
- 734 48. Barthold SW, Cadavid D, Philipp MT. Animal Models of Borreliosis. In: Samuels  
735 DS, Radolf JD, editors. *Borrelia Molecular Biology, Host Interaction and Pathogenesis*.  
736 Norfolk, UK: Caister Academic Press; 2010. p. 353-405.
- 737 49. Yrjanainen H, Hytonen J, Hartiala P, Oksi J, Viljanen MK. Persistence of  
738 borrelial DNA in the joints of *Borrelia burgdorferi*-infected mice after ceftriaxone  
739 treatment. *Apmis*. 2010;118(9):665-73.
- 740 50. Barthold SW, Hodzic E, Imai DM, Feng S, Yang X, Luft BJ. Ineffectiveness of  
741 tigecycline against persistent *Borrelia burgdorferi*. *Antimicrob Agents Chemother*.  
742 2010;54(2):643-51.
- 743 51. Straubinger RK, Straubinger AF, Summers BA, Jacobson RH. Status of *Borrelia*  
744 *burgdorferi* infection after antibiotic treatment and the effects of corticosteroids: An  
745 experimental study. *J Infect Dis*. 2000;181(3):1069-81.

- 746 52. Straubinger RK, Straubinger AF, Summers BA, Jacobson RH, Erb HN. Clinical  
747 manifestations, pathogenesis, and effect of antibiotic treatment on Lyme borreliosis in  
748 dogs. *Wien Klin Wochenschr.* 1998;110(24):874-81.
- 749 53. Embers ME, Barthold SW, Borda JT, Bowers L, Doyle L, Hodzic E, et al.  
750 Persistence of *Borrelia burgdorferi* in rhesus macaques following antibiotic treatment of  
751 disseminated infection. *PLoS One.* 2012;7(1):e29914.
- 752 54. Embers ME, Hasenkampf NR, Jacobs MB, Tardo AC, Crossland NA, Doyle-  
753 Meyers LA, et al. Variable manifestations, diverse seroreactivity and post-treatment  
754 persistence in nonhuman primates exposed to *Borrelia burgdorferi* by toick feeding. *PLoS*  
755 *One.* 2017;Submitted:1-29.
- 756 55. Embers ME, Ramamoorthy R, Philipp MT. Survival strategies of *Borrelia*  
757 *burgdorferi*, the etiologic agent of Lyme disease. *Microbes Infect.* 2004;6(3):312-8.
- 758 56. Tilly K, Rosa PA, Stewart PE. Biology of infection with *Borrelia burgdorferi*.  
759 *Infect Dis Clin North Am.* 2008;22(2):217-34, v.
- 760 57. Tracy KE, Baumgarth N. *Borrelia burgdorferi* Manipulates Innate and Adaptive  
761 Immunity to Establish Persistence in Rodent Reservoir Hosts. *Front Immunol.*  
762 2017;8:116.
- 763 58. Anguita J, Hedrick MN, Fikrig E. Adaptation of *Borrelia burgdorferi* in the tick  
764 and the mammalian host. *FEMS Microbiol Rev.* 2003;27(4):493-504.
- 765 59. Smith AJ, Oertle J, Prato P. Chronic Lyme Disease: Persistent Clinical  
766 Symptoms Related to Immune Evasion, Antibiotic Resistance and Various Defense  
767 Mechanisms of *Borrelia burgdorferi* *Open Journal of Medical Microbiology.* 2014;4:252-  
768 60.
- 769 60. Straubinger RK, Straubinger AF, Summers BA, Erb HN, Harter L, Appel MJ.  
770 *Borrelia burgdorferi* induces the production and release of proinflammatory cytokines in  
771 canine synovial explant cultures. *Infect Immun.* 1998;66(1):247-58.
- 772 61. Lewis K. Persister cells. *Annu Rev Microbiol.* 2010;64:357-72.
- 773 62. Lewis K. Multidrug tolerance of biofilms and persister cells. *Curr Top Microbiol*  
774 *Immunol.* 2008;322:107-31.
- 775 63. Biskup UG, Strle F, Ruzic-Sabljić E. Loss of plasmids of *Borrelia burgdorferi*  
776 *sensu lato* during prolonged in vitro cultivation. *Plasmid.* 2011;66(1):1-6.
- 777 64. Purser JE, Norris SJ. Correlation between plasmid content and infectivity in  
778 *Borrelia burgdorferi*. *Proc Natl Acad Sci U S A.* 2000;97(25):13865-70.
- 779 65. Schwan TG, Burgdorfer W, Garon CF. Changes in infectivity and plasmid profile  
780 of the Lyme disease spirochete, *Borrelia burgdorferi*, as a result of in vitro cultivation.  
781 *Infect Immun.* 1988;56(8):1831-6.
- 782 66. AVMA. AVMA Guidelines for the Euthanasia of Animals: 2013 Edition.  
783 Schumberg, IL: American Veterinary Medical Association; 2013.
- 784 67. Barbour AG. Isolation and cultivation of Lyme disease spirochetes. *Yale J Biol*  
785 *Med.* 1984;57(4):521-5.
- 786 68. Barthold SW, deSouza MS, Janotka JL, Smith AL, Persing DH. Chronic Lyme  
787 borreliosis in the laboratory mouse. *Am J Pathol.* 1993;143(3):951-71.
- 788 69. Hodzic E, Feng S, Freet KJ, Barthold SW. *Borrelia burgdorferi* population  
789 dynamics and prototype gene expression during infection of immunocompetent and  
790 immunodeficient mice. *Infect Immun.* 2003;71(9):5042-55.

- 791 70. Hodzic E, Feng S, Barthold SW. Assessment of transcriptional activity of *Borrelia*  
792 *burgdorferi* and host cytokine genes during early and late infection in a mouse model.  
793 *Vector Borne Zoonotic Dis.* 2013;13(10):694-711.
- 794 71. Hodzic E, Feng S, Freet KJ, Borjesson DL, Barthold SW. *Borrelia burgdorferi*  
795 population kinetics and selected gene expression at the host-vector interface. *Infect*  
796 *Immun.* 2002;70(7):3382-8.
- 797 72. Arvikar SL, Steere AC. Diagnosis and Treatment of Lyme Arthritis. *Infect Dis*  
798 *Clin North Am.* 2015;29(2):269-80.
- 799 73. Wormser GP, Nadelman RB, Dattwyler RJ, Dennis DT, Shapiro ED, Steere AC,  
800 et al. Practice guidelines for the treatment of Lyme disease. The Infectious Diseases  
801 Society of America. *Clin Infect Dis.* 2000;31 Suppl 1:1-14.
- 802 74. Maloney EL. Controversies in Persistent (Chronic) Lyme Disease. *J Infus Nurs.*  
803 2016;39(6):369-75.
- 804 75. Crossland NA, Alvarez X, Embers ME. Late Disseminated Lyme Disease:  
805 Associated Pathology and Spirochete Persistence Posttreatment in Rhesus Macaques. *Am*  
806 *J Pathol.* 2018;188(3):672-82.
- 807 76. Salo J, Jaatinen A, Soderstrom M, Viljanen MK, Hytonen J. Decorin binding  
808 proteins of *Borrelia burgdorferi* promote arthritis development and joint specific post-  
809 treatment DNA persistence in mice. *PLoS One.* 2015;10(3):e0121512.
- 810 77. Ma Y, Seiler KP, Eichwald EJ, Weis JH, Teuscher C, Weis JJ. Distinct  
811 characteristics of resistance to *Borrelia burgdorferi*-induced arthritis in C57BL/6N mice.  
812 *Infect Immun.* 1998;66(1):161-8.
- 813 78. Barthold SW. Infectivity of *Borrelia burgdorferi* relative to route of inoculation  
814 and genotype in laboratory mice. *J Infect Dis.* 1991;163(2):419-20.
- 815 79. Montgomery RR, Booth CJ, Wang X, Blaho VA, Malawista SE, Brown CR.  
816 Recruitment of macrophages and polymorphonuclear leukocytes in Lyme carditis. *Infect*  
817 *Immun.* 2007;75(2):613-20.
- 818 80. Armstrong AL, Barthold SW, Persing DH, Beck DS. Carditis in Lyme disease  
819 susceptible and resistant strains of laboratory mice infected with *Borrelia burgdorferi*.  
820 *Am J Trop Med Hyg.* 1992;47(2):249-58.
- 821 81. Yrjanainen H, Hytonen J, Soderstrom KO, Oksi J, Hartiala K, Viljanen MK.  
822 Persistent joint swelling and *Borrelia*-specific antibodies in *Borrelia garinii*-infected mice  
823 after eradication of vegetative spirochetes with antibiotic treatment. *Microbes Infect.*  
824 2006;8(8):2044-51.
- 825 82. Wormser GP, Schwartz I. Antibiotic treatment of animals infected with *Borrelia*  
826 *burgdorferi*. *Clin Microbiol Rev.* 2009;22(3):387-95.
- 827 83. Wormser GP, O'Connell S, Pachner AR, Schwartz I, Shapiro ED, Stanek G, et al.  
828 Critical analysis of a doxycycline treatment trial of rhesus macaques infected with  
829 *Borrelia burgdorferi*. *Diagn Microbiol Infect Dis.* 2018;92(3):183-8.
- 830 84. Iyer R, Mukherjee P, Wang K, Simons J, Wormser GP, Schwartz I. Detection of  
831 *Borrelia burgdorferi* nucleic acids after antibiotic treatment does not confirm viability. *J*  
832 *Clin Microbiol.* 2013;51(3):857-62.
- 833 85. Pavia CS, Wormser GP. Culture of the entire mouse to determine whether  
834 cultivable *Borrelia burgdorferi* persists in infected mice treated with a five-day course of  
835 Ceftriaxone. *Antimicrob Agents Chemother.* 2014;58(11):6701-3.



- 836 86. Wormser GP, Dattwyler RJ, Shapiro ED, Halperin JJ, Steere AC, Klemmner MS,  
837 et al. The clinical assessment, treatment, and prevention of Lyme disease, human  
838 granulocytic anaplasmosis, and babesiosis: clinical practice guidelines by the Infectious  
839 Diseases Society of America. *Clin Infect Dis*. 2006;43(9):1089-134.
- 840 87. Choe H, Inaba Y, Kobayashi N, Ike H, Iwamoto N, Ishida T, et al., editors. How  
841 long can Dead Bacterial DNA be Detected by Real-Time PCR? 56th Annual Meeting of  
842 the Orthopaedic Research Society; 2010; New Orleans, LA: University of Pennsylvania  
843 Orthopaedic Journal
- 844 88. Burger J, Hummel S, Hermann B, Henke W. DNA preservation: a microsatellite-  
845 DNA study on ancient skeletal remains. *Electrophoresis*. 1999;20(8):1722-8.
- 846 89. Lindahl T. Instability and decay of the primary structure of DNA. *Nature*.  
847 1993;362(6422):709-15.
- 848 90. Laalami S, Zig L, Putzer H. Initiation of mRNA decay in bacteria. *Cell Mol Life*  
849 *Sci*. 2014;71(10):1799-828.
- 850 91. Hu Y, Mangan JA, Dhillon J, Sole KM, Mitchison DA, Butcher PD, et al.  
851 Detection of mRNA transcripts and active transcription in persistent *Mycobacterium*  
852 *tuberculosis* induced by exposure to rifampin or pyrazinamide. *J Bacteriol*.  
853 2000;182(22):6358-65.
- 854 92. Cangelosi GA, Meschke JS. Dead or alive: molecular assessment of microbial  
855 viability. *Appl Environ Microbiol*. 2014;80(19):5884-91.
- 856 93. Feng J, Li T, Zhang Y. Biofilm Structures of *Borrelia burgdorferi* Not Only  
857 Display More Tolerance to Lyme Antibiotics But Also Cause More Severe Pathology In  
858 a Mouse Arthritis Model: Implications for Understanding Persistence, PTLDS, and  
859 Treatment Failure. *bioRxiv*, The Reprint Server for Biology [Internet]. 2018:[1-9 pp.].  
860 Available from:  
861 <https://www.biorxiv.org/content/biorxiv/early/2018/10/13/440461.full.pdf>.
- 862 94. Imai DM, Feng S, Hodzic E, Barthold SW. Dynamics of connective-tissue  
863 localization during chronic *Borrelia burgdorferi* infection. *Lab Invest*. 2013;93(8):900-10.
- 864 95. Barthold SW, Hodzic E, Tunev S, Feng S. Antibody-mediated disease remission  
865 in the mouse model of Lyme borreliosis. *Infect Immun*. 2006;74(8):4817-25.
- 866 96. Barthold SW, deSouza M, Feng S. Serum-mediated resolution of Lyme arthritis in  
867 mice. *Lab Invest*. 1996;74(1):57-67.
- 868 97. Barthold SW, Feng S, Bockenstedt LK, Fikrig E, Feen K. Protective and arthritis-  
869 resolving activity in sera of mice infected with *Borrelia burgdorferi*. *Clin Infect Dis*.  
870 1997;25(Suppl 1):S9-17.
- 871 98. Shih CM, Liu LP, Spielman A. Differential spirochetal infectivities to vector ticks  
872 of mice chronically infected by the agent of Lyme disease. *J Clin Microbiol*.  
873 1995;33(12):3164-8.
- 874 99. Lewis K. Persister cells, dormancy and infectious disease. *Nat Rev Microbiol*.  
875 2007;5(1):48-56.
- 876 100. Hamad MA, Austin CR, Stewart AL, Higgins M, Vazquez-Torres A, Voskuil MI.  
877 Adaptation and antibiotic tolerance of anaerobic *Burkholderia pseudomallei*.  
878 *Antimicrobial agents and chemotherapy*. 2011;55(7):3313-23.
- 879 101. Allison KR, Brynildsen MP, Collins JJ. Metabolite-enabled eradication of  
880 bacterial persisters by aminoglycosides. *Nature*. 2011;473(7346):216-20.

- 881 102. Mulcahy LR, Burns JL, Lory S, Lewis K. Emergence of *Pseudomonas aeruginosa*  
882 strains producing high levels of persister cells in patients with cystic fibrosis. *J Bacteriol.*  
883 2010;192(23):6191-9.
- 884 103. Lafleur MD, Qi Q, Lewis K. Patients with long-term oral carriage harbor high-  
885 persister mutants of *Candida albicans*. *Antimicrob Agents Chemother.* 2010;54(1):39-44.
- 886 104. Colijn C, Cohen T, Fraser C, Hanage W, Goldstein E, Givon-Lavi N, et al. What  
887 is the mechanism for persistent coexistence of drug-susceptible and drug-resistant strains  
888 of *Streptococcus pneumoniae*? *J R Soc Interface.* 2010;7(47):905-19.
- 889 105. Dhar N, McKinney JD. Microbial phenotypic heterogeneity and antibiotic  
890 tolerance. *Curr Opin Microbiol.* 2007;10(1):30-8.
- 891 106. Adams KN, Takaki K, Connolly LE, Wiedenhof H, Winglee K, Humbert O, et al.  
892 Drug tolerance in replicating mycobacteria mediated by a macrophage-induced efflux  
893 mechanism. *Cell.* 2011;145(1):39-53.
- 894 107. Boxall AB. The environmental side effects of medication. *EMBO reports.*  
895 2004;5(12):1110-6.
- 896 108. O'Reilly KM, Urban MA, Barriero T, Betts RF, Trawick DR. Persistent culture-  
897 positive *Legionella* infection in an immunocompromised host. *Clin Infect Dis.*  
898 2005;40(10):e87-9.
- 899 109. Schindel C, Siepmann U, Han S, Ullmann AJ, Mayer E, Fischer T, et al.  
900 Persistent *Legionella* infection in a patient after bone marrow transplantation. *J Clin*  
901 *Microbiol.* 2000;38(11):4294-5.
- 902 110. Boumart Z, Roche SM, Lalande F, Virlogeux-Payant I, Hennequet-Antier C,  
903 Menanteau P, et al. Heterogeneity of persistence of *Salmonella enterica* serotype  
904 Senftenberg strains could explain the emergence of this serotype in poultry flocks. *PLoS*  
905 *One.* 2012;7(4):e35782.
- 906 111. Fauvart M, De Groote VN, Michiels J. Role of persister cells in chronic  
907 infections: clinical relevance and perspectives on anti-persister therapies. *Journal of*  
908 *medical microbiology.* 2011;60(Pt 6):699-709.
- 909 112. Levin BR, Rozen DE. Non-inherited antibiotic resistance. *Nat Rev Microbiol.*  
910 2006;4(7):556-62.

911

## 912 **ACKNOWLEDGMENT**

913 The technical assistance of Kim Olsen and Cara Wademan was essential to this study and  
914 is greatly appreciated. We thank Dr. Melissa J. Caimano for providing *I. scapularis* larval  
915 ticks and Dr. Monica E. Embers for providing culture media.

## 916 **AUTHORS CONTRIBUTION**

917 Conceived and designed the experiments: EH. Performed the experiments: EH DI EE.

918 Analyzed the data: EH DI EE. Contributed reagents/materials/analysis tools: DI EE.

919 Wrote the paper: EH DI.

920

## 921 **FIGURE LEGEND**

922 **Figure 1.** Copy numbers of *B. burgdorferi* DNA of *flaB/ospA* genes in heart base (HB),  
923 ventricular muscle (VM), and tibiotarsus (TT) of C3H and B6 mice infected with either  
924 N40 or B31 strains at 12 months after ceftriaxone and saline solution treatment.

925 \*Significantly higher copy number (p<0.05)

926 **Figure 2.** Copy numbers of *B. burgdorferi* DNA of *flaB/ospA* genes in heart base (HB),  
927 ventricular muscle (VM), and tibiotarsus (TT) of C3H and B6 mice infected with either  
928 N40 or B31 strains at 18 months after ceftriaxone and saline solution treatment.

929 \*Significantly higher copy number (p<0.05)

930 **Figure 3.** Darkfield images of cultured *B. burgdorferi* from mouse tissues necropsied 18  
931 months after completion of treatment. Magnification 400x. **A.** Note numerous  
932 spirochetes from ear culture of saline solution treated C3H mouse infected with strain  
933 N40. **B.** Ear culture of ceftriaxone treated B6 mouse infected with strain B31. **C.** Front  
934 joint of ceftriaxone treated B6 mouse infected with strain N40

935 **Figure 4.** Histology of the heart base of ceftriaxone and saline solution treated mice  
936 necropsied at 12 and 18 months after treatment

937 **Figure 5.** Chronic periarteritis observed in a C3H mouse infected with *B. burgdorferi*  
938 B31 then treated saline solution and necropsied 18 months after treatment (**A** and **B**).



939 Tenosynovitis observed in a B6 mouse infected with *B. burgdorferi* N40 then treated with  
940 saline solution and necropsied at 18 months after treatment (C).

941

942

943

944

945

946

947

948

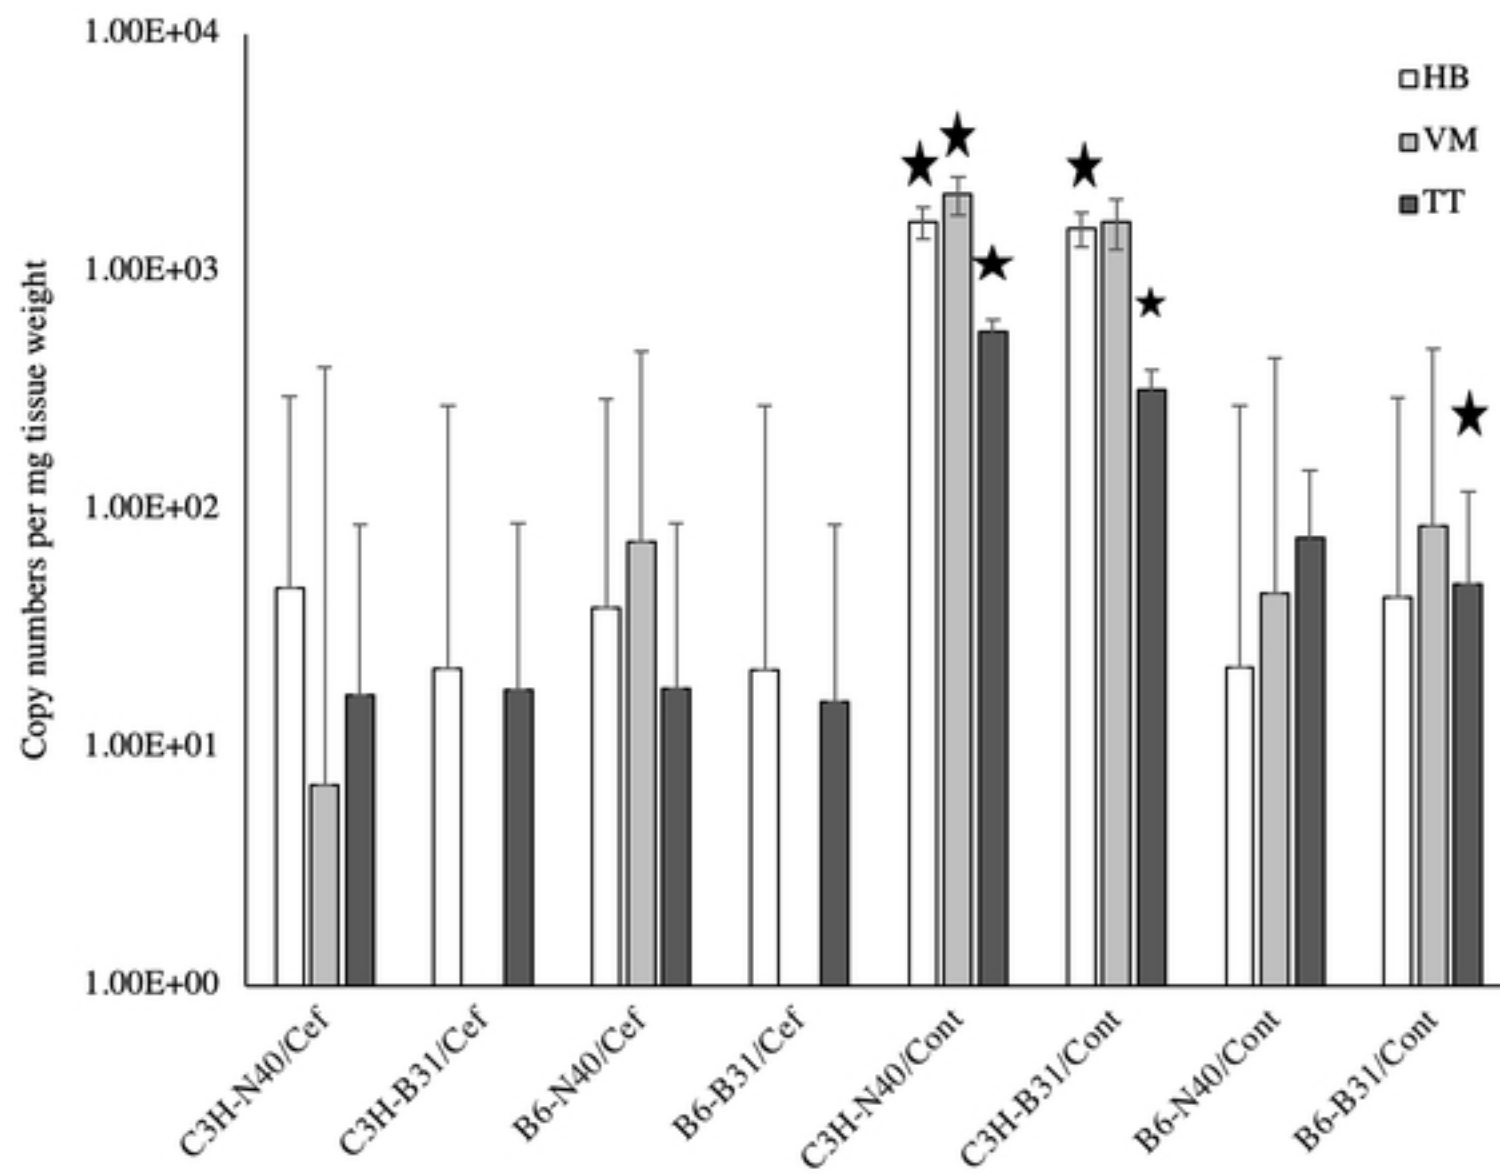

Figure 1

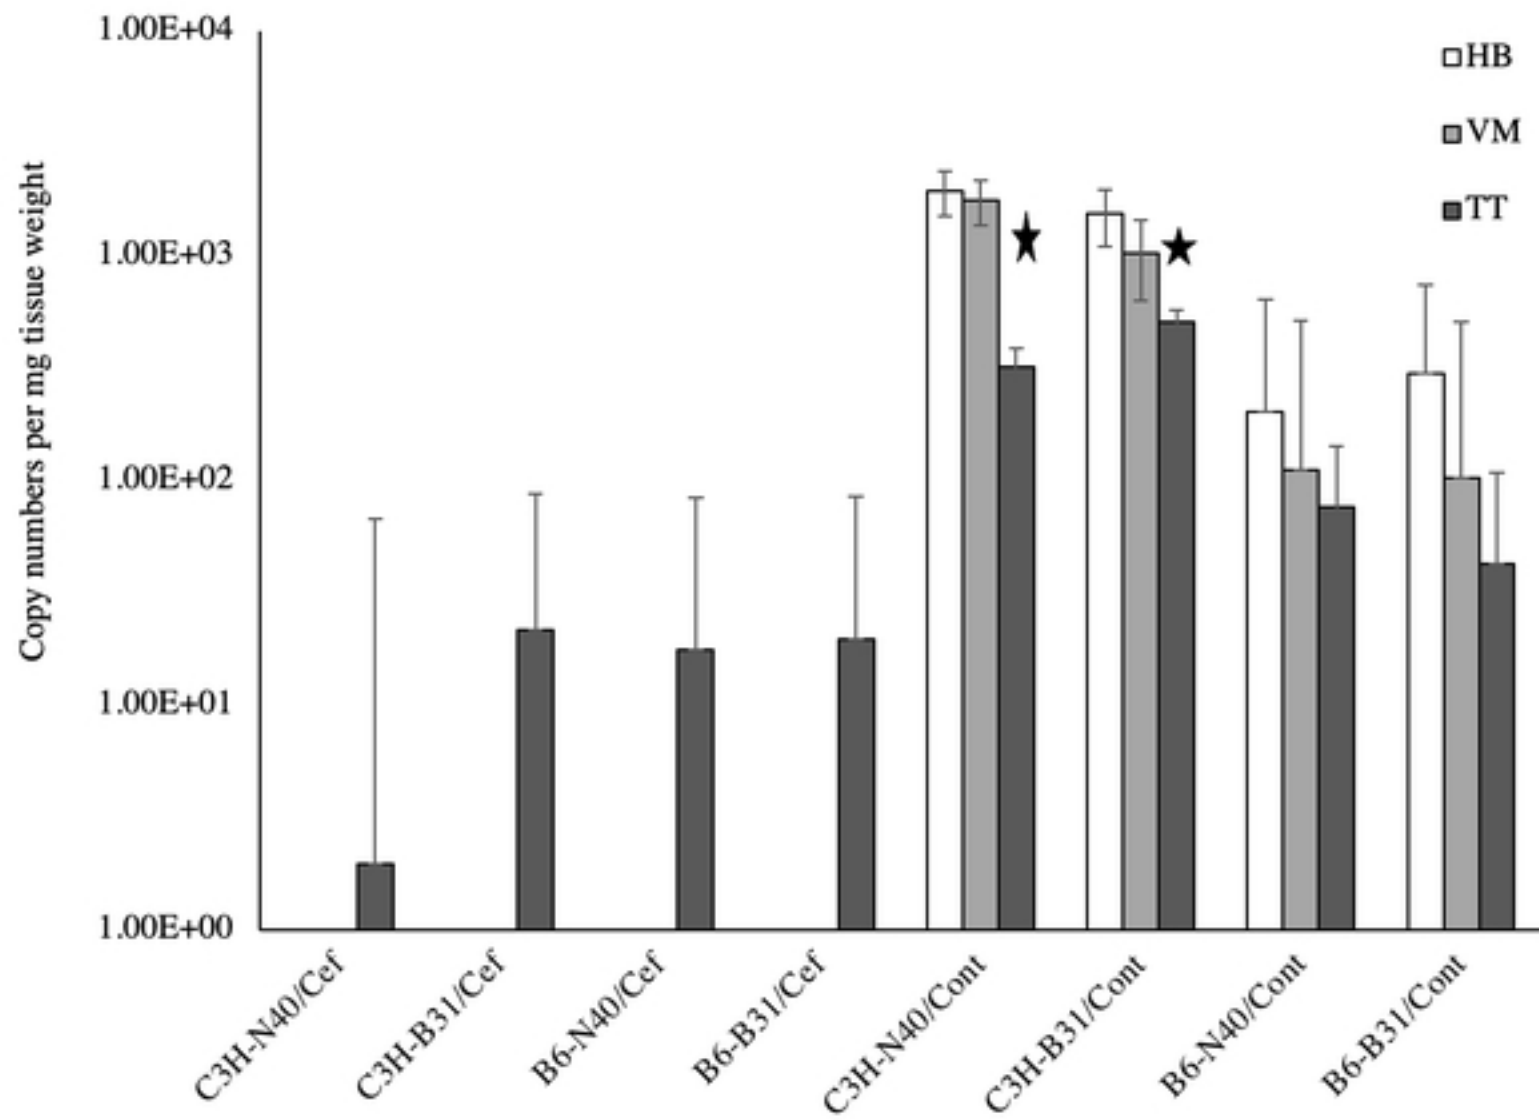

Figure2

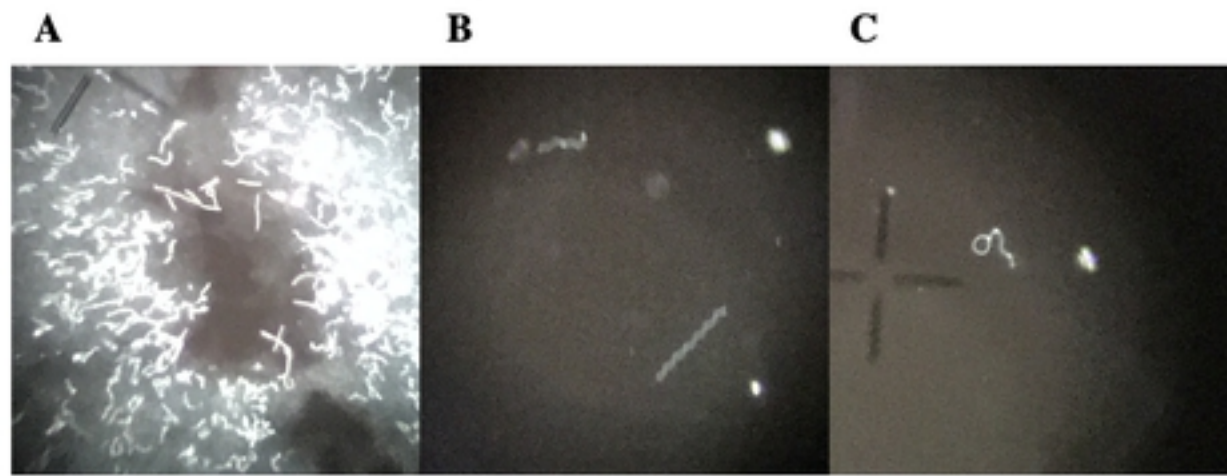

Figure3

Ceftriaxone treated

Saline treated

Ceftriaxone treated

Saline treated

12 months

18 months

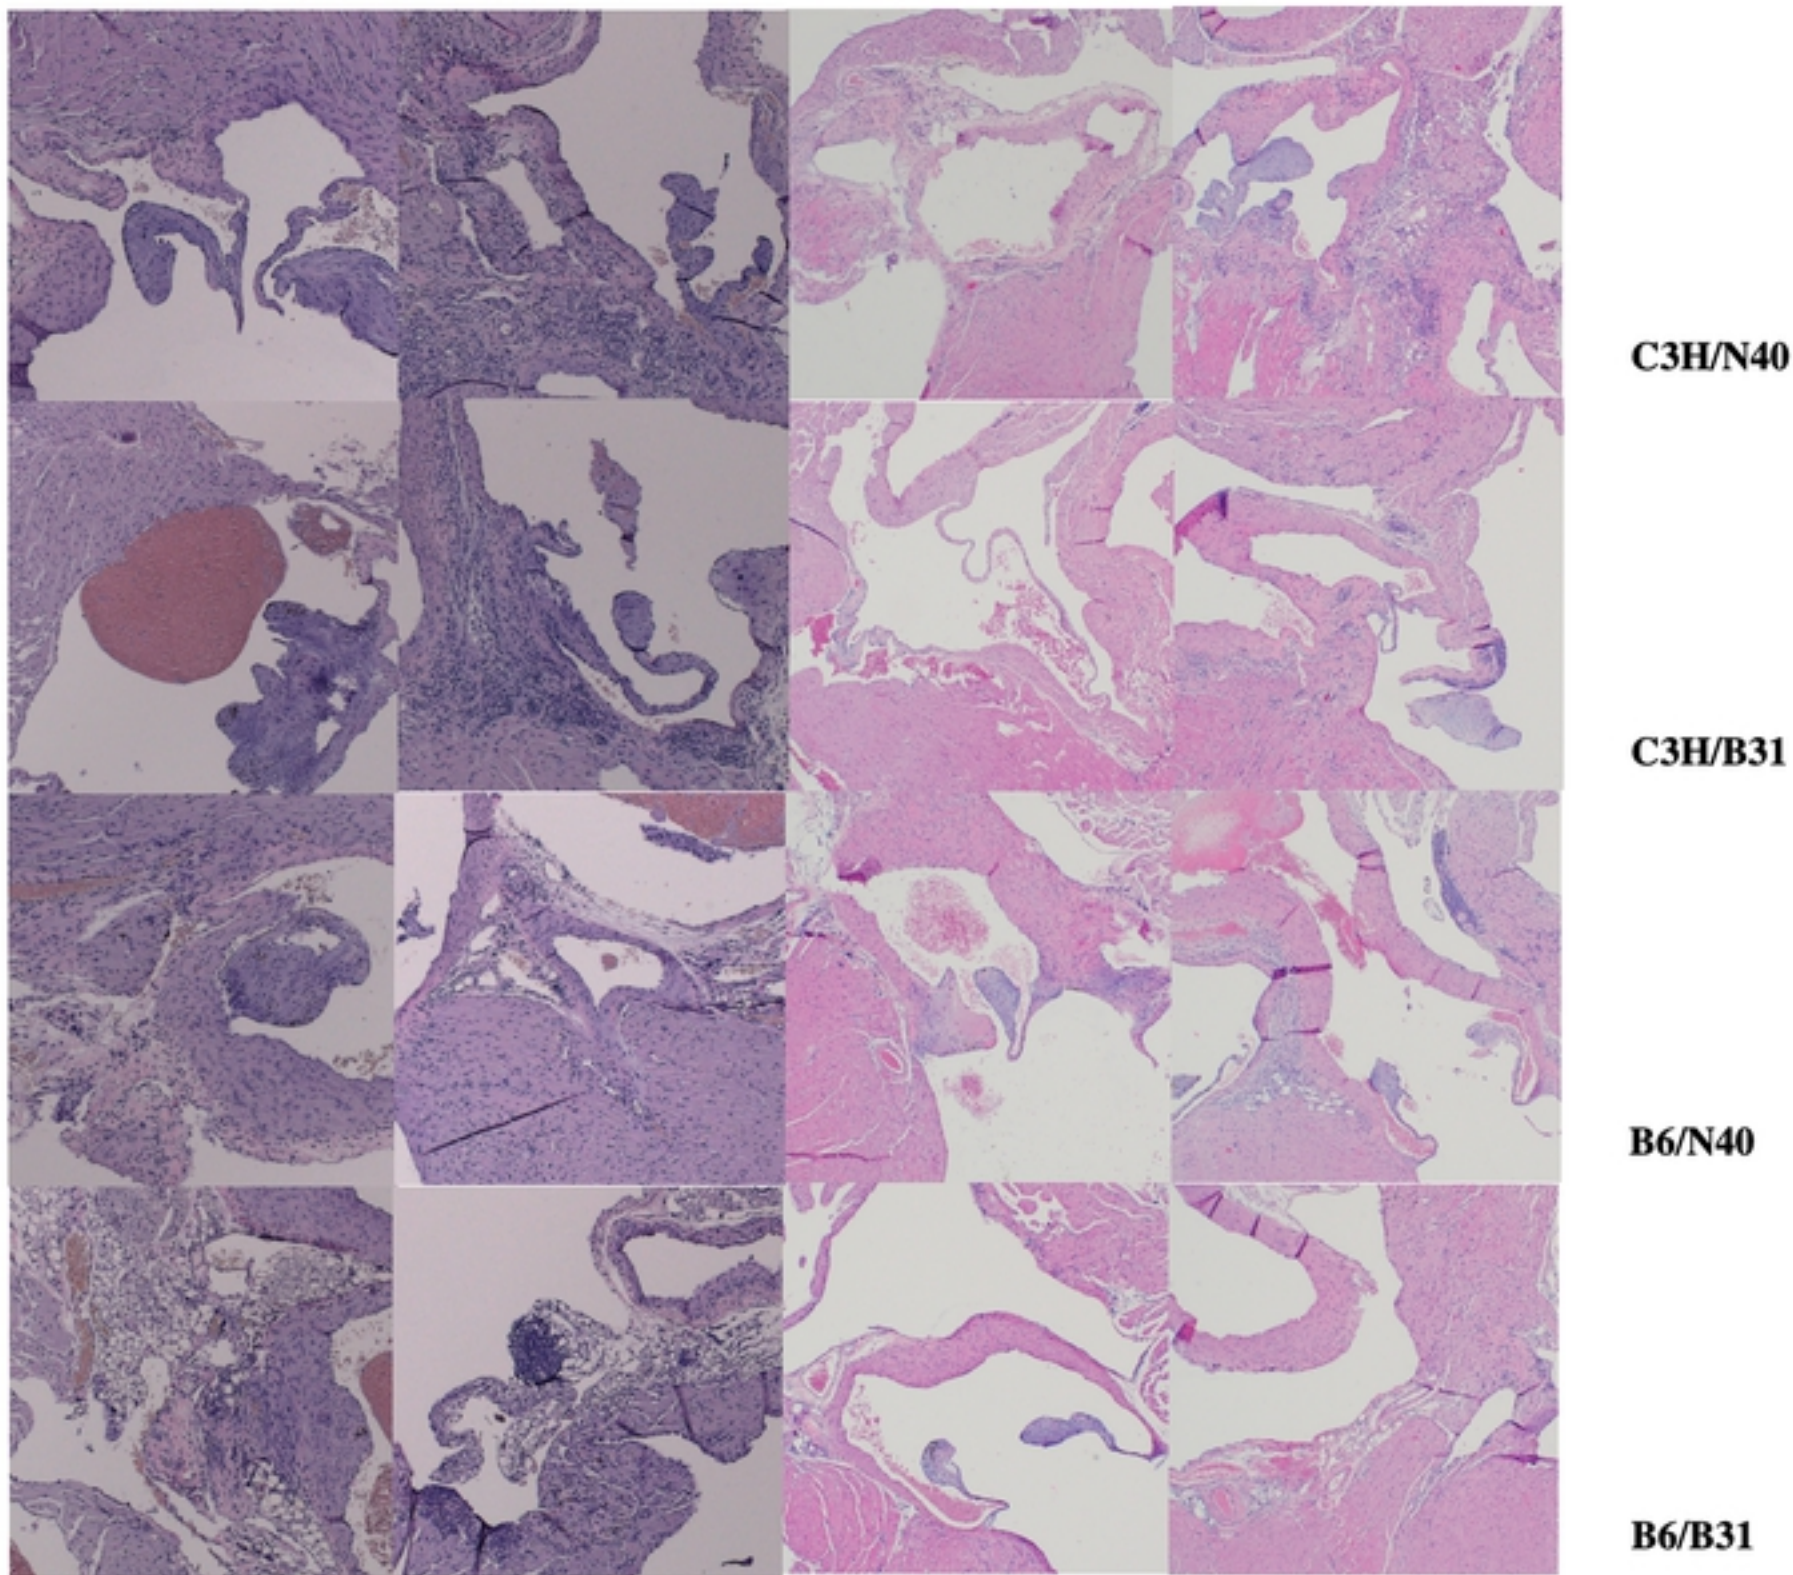

Figure4



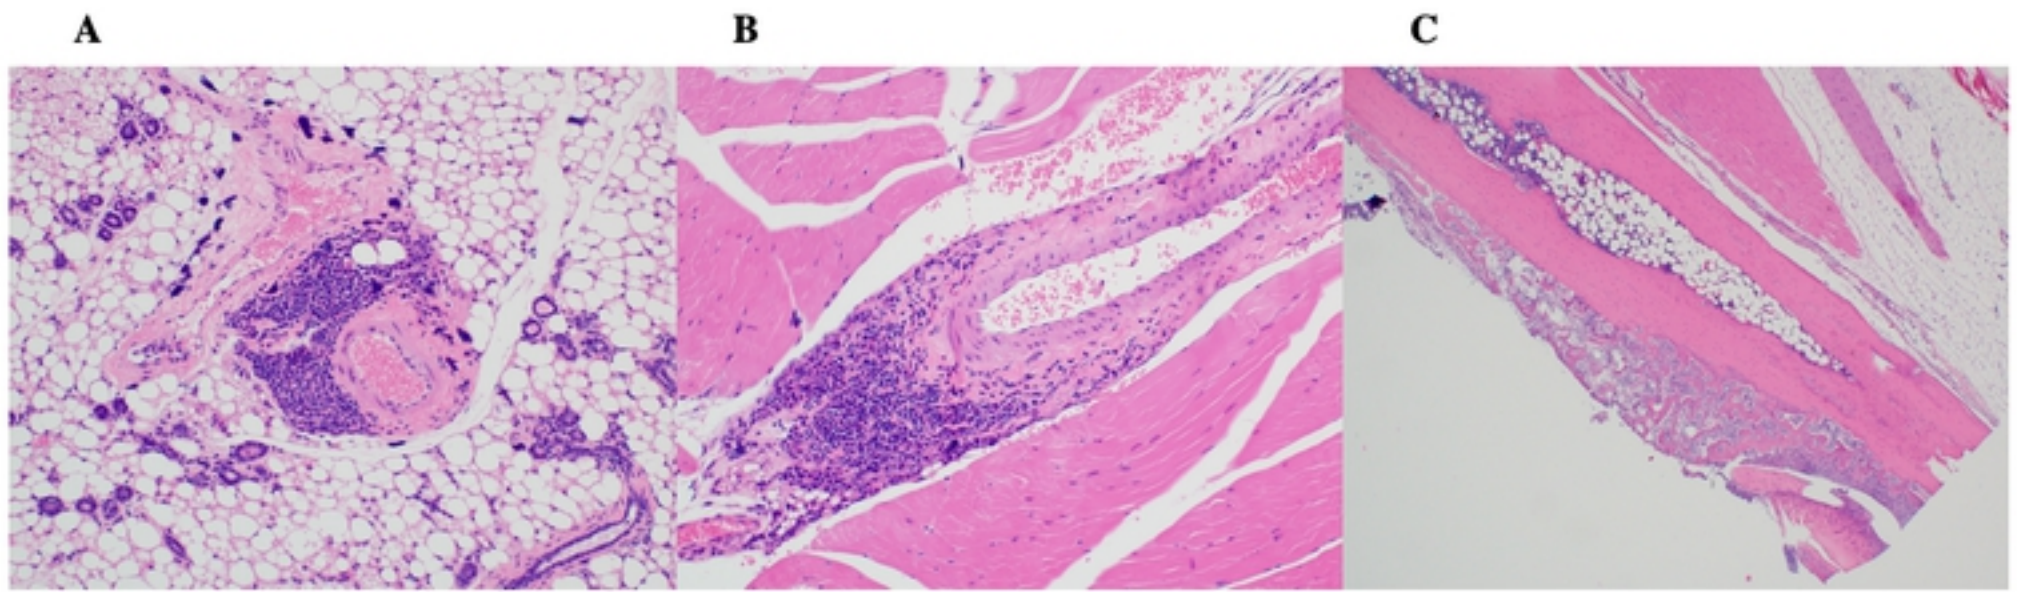

Figure 5
